1  
2  
3  
4  
5  
6  
7  
8  
9  
10  
11  
12  
13  
14  
15  
16  
17  
18  
19  
20  
21  
22  
23  
24  
25  
26  
27  
28  
29

**FRONT MATTER**

**TITLE**

Encoding of odor information and reward anticipation in anterior cortical amygdaloid nucleus

**Authors**

Kazuki Shiotani<sup>1,2, †</sup>, Yuta Tanisumi<sup>1,2, †</sup>, Junya Hirokawa<sup>1</sup>, Yoshio Sakurai<sup>1</sup> and Hiroyuki Manabe<sup>1</sup>

**Affiliations**

<sup>1</sup> Laboratory of Neural Information, Graduate School of Brain Science, Doshisha University, Kyoto, Japan.

<sup>2</sup> Research Fellow of the Japan Society for the Promotion of Science, Tokyo, Japan.

†These authors contributed equally to this work.

**Corresponding author:**

Hiroyuki Manabe, Ph.D.

Laboratory of Neural Information, Graduate School of Brain Science, Doshisha University, Kyoto, Japan.

Phone: +81-774-65-7181

Email: [hmanabe@mail.doshisha.ac.jp](mailto:hmanabe@mail.doshisha.ac.jp)

30 **Abstract**

31 Olfactory information directly reaches the amygdala through the olfactory cortex, without the  
32 involvement of thalamic areas, unlike other sensory systems. The anterior cortical  
33 amygdaloid nucleus (ACo) is one of the olfactory cortices that receives olfactory sensory input,  
34 and is part of the olfactory cortical amygdala, which relays olfactory information to the  
35 amygdala. To examine its electrophysiological features, we recorded individual ACo neurons  
36 during the odor-guided go/no-go task to obtain a water reward. Many ACo neurons exhibited  
37 odor-evoked go cue-preferred during the late phase of odor-sampling supporting the  
38 population dynamics that differentiate go/no-go responses before executing the odor-evoked  
39 behaviors. We observed two types of neurons with different anticipation signals: one neuron  
40 type exhibited gradual increases of activity toward reward delivery, while another type  
41 exhibited a phasic go cue-preferred activity during odor sampling as well as another phasic  
42 anticipatory activity for rewards. These results suggest that the ACo may be involved in  
43 reward-related behavioral learning by associating the olfactory information with reward  
44 anticipation.

45

46

47 **MAIN TEXT**

48 **Introduction**

49 Olfaction is closely related to emotion in attributing positive (attractive) or negative  
50 (aversive) valence to the environment more than any other sensory modality<sup>12</sup>. The close  
51 bidirectional connection and the particular organization of the olfactory cortex to the  
52 amygdala distinguishes the olfactory system from other sensory systems<sup>34</sup>. Afferent sensory  
53 inputs from the main olfactory bulb (OB) directly target the amygdala through the olfactory

54 cortex, while afferent inputs from most of the other sensory systems enter the amygdala via  
55 the thalamus and neocortical regions<sup>5</sup>. OB mitral cells project their axons through the lateral  
56 olfactory tract to the olfactory cortex<sup>6</sup>. Olfactory cortical amygdala, which is a part of the  
57 olfactory cortex, relays olfactory information to the amygdala. The anterior cortical  
58 amygdaloid nucleus (ACo) is a part of the olfactory cortical amygdala, and has a bidirectional  
59 connection with the amygdala.

60 A study reported that the ACo receives dense projections from the main olfactory  
61 bulb (OB), moderate projections from the piriform cortex, lateral entorhinal cortex,  
62 basomedial amygdaloid nucleus (BMA), and medial amygdaloid nucleus (Me), and scarce  
63 projections from the ventral tegmental area (VTA) and the ventral tenia tecta (vTT)<sup>3</sup>.  
64 Moreover, the ACo projects densely to BMA<sup>3</sup>. These anatomical studies indicate that the  
65 ACo is closely related to the amygdala, and it is possible that the ACo is involved in  
66 odor-evoked motivational behaviors.

67 A behavioral study revealed that ACo participates in olfactory fear conditioning in  
68 rats as electrical stimulation of the olfactory bulb induces evoked field potential signals  
69 (EFPs), that are persistently potentiated specifically in the ACo after training<sup>7</sup>. Moreover,  
70 electrical stimulation of the ventral tegmental area (VTA) showed that the ACo, besides other  
71 mesolimbic structures, displays increased Fos expression in rats<sup>8</sup>. A whole-cell patch clamp  
72 study showed that with the activation of sodium conductance, pyramidal neurons of the ACo  
73 displayed rhythmic fluctuations of intrinsically generated voltage-dependent membrane  
74 potential in the theta-low beta range, suggesting that the ACo was related to synaptic  
75 plasticity and learning<sup>9</sup>. ACo has been poorly investigated, but comprehensive evidence  
76 suggests that it may play a prominent role in reward-related behavioral learning by olfactory

77 stimulation. However, little is known about the electrophysiological features of the ACo  
78 neurons for reward-related behavioral tasks.

79 Here, we recorded the neural activity of ACo neurons during odor-guided  
80 reward-directed behaviors. Many ACo neurons responded to the go-cue odor stimulus at the  
81 late phase of the odor-sampling epoch (from the odor valve off to the odor port exit). The  
82 ACo neuron population showed profound and persistent transformations in the dynamics of  
83 cue encoding over 400 ms after odor onset. Furthermore, we found that the ACo neuron  
84 groups each coded a different type of anticipation signal: one neuron group type exhibited  
85 gradual increases in the signals to the reward, while the other type showed phasic anticipation  
86 signals with the go-cue preference responses during odor sampling. Our results suggest that  
87 the ACo neurons may play an important role in odor-guided reward-directed learning.

88

89

## 90 **Results**

### 91 **Go-Cue-Odor preferred responses of ACo neurons during the late phase of** 92 **odor-sampling epoch**

93 We recorded 158 well-isolated neurons in the ACo of four mice performing an odor-guided  
94 go/no-go task (Fig. 1a, recording positions are shown in Fig. 1b). Briefly, the go trial requires  
95 the mice to first sample a go-cue odor presented at an odor port and then to move to a reward  
96 port to receive water reward. Conversely, the no-go trial requires the mice to first sample a  
97 no-go-cue odor presented at the odor port and then to stay near it to wait for the next trial. It  
98 is important to note that the mice were required to keep their nose inserted into the odor port,  
99 at least during odor presentation (500 ms). After the mice were well trained, their behavioral  
100 accuracy remained above 80% throughout the session. For all mice, the median duration of

101 the odor-sampling epoch (the time from odor valve opening until the mouse withdrew its  
102 snout from the odor port) was 1053 ms (interquartile range: 902–1212 ms) in the go trials,  
103 and 764 ms (interquartile range: 657–968 ms) in the no-go trials (31 sessions from four  
104 mice).

105         Since the ACo receives direct inputs from the mitral cells of the olfactory bulb, we  
106 first focused on whether ACo neurons exhibited cue-odor selective activity during  
107 odor-sampling epochs (from odor poke-in to odor poke-out). We found that a subset of ACo  
108 neurons increased their firing rates during the odor presentation phase (0–500 ms after the  
109 odor valve opening) during both go and no-go trials, and then showed a go-cue-odor  
110 preferred response 500 ms after the odor onset (an example shown in Fig. 1c). To quantify  
111 the dynamics of the cue-encoding, we calculated the firing rate changes from baseline (200 to  
112 0 ms before the end of the inter-trial interval) in the sliding bins during the odor-sampling  
113 epoch for each neuron. For each correct trial, we calculated the area under the receiver  
114 operating characteristic curve (auROC) value at each time bin (width: 100 ms, step: 20 ms),  
115 and defined the go-cue selective neurons ( $n = 57$  neurons, 36.1 % of the recorded neurons) as  
116 those neurons that significantly increased their firing rates from the baseline ( $p < 0.01$ ,  
117 permutation test) for five consecutive bins (100 ms) during the odor-sampling epoch in the go  
118 correct trials (Fig. 1d). Across the go-cue odor-selective population, calculation of go-cue  
119 versus no-go-cue preferences during odor-sampling epochs clearly showed a go-cue  
120 preference manner from 500 ms after the odor onset to the odor poke-out (late phase of the  
121 odor sampling epoch) (Fig. 1e,  $p < 0.01$ , permutation test). These results suggest that the ACo  
122 received not only a particular odorant profile directly from the olfactory bulb but rather the  
123 complex odor information, including behavioral contexts from other olfactory cortical areas  
124 and top-down inputs from higher areas.

125

126 **Late phase of go-cue odor preferred responses were evoked by the odor onsets and were**  
127 **stable across trials**

128 The go-cue odor-selective population showed cue-odor-preferred responses during the late  
129 phase of the odor sampling epoch (Fig. 1c). It is possible that the late phase of odor-preferred  
130 responses was tuned to the odor port exit behaviors or contained the premotor signals that  
131 were observed in many brain regions<sup>101112</sup>. To take these signals into account, and to help  
132 isolate signals related to odor presentation and action, we developed an encoding model  
133 (generalized linear model, GLM). This model incorporated task-related variables during the  
134 odor-sampling epoch as predictors of each neuron's activity (Fig. 2a and Supplementary Figs.  
135 1a-c)<sup>13</sup>.

136 Using this encoding model, we quantified the relative contribution of each  
137 behavioral variable during the odor-sampling epoch to the response of each neuron by  
138 determining how much the explained variance declined when that variable was removed from  
139 the model (see Materials and methods; a relative contribution for an example neuron is shown  
140 in Fig. 2a and Supplementary Fig. 1e). Averaged across the go-cue odor selective population,  
141 the highest relative contribution during odor-sampling epochs was attributed to late go-cue  
142 odor sampling ( $36.1 \pm 3.3\%$  of the total variance explained during the odor-sampling epoch),  
143 followed in descending order by the go-cue odor presentation ( $23.2 \pm 1.7\%$ ), the no-go-cue  
144 odor presentation ( $18.5 \pm 1.6\%$ ), the late no-go-cue odor sampling ( $9.9 \pm 1.5\%$ ),  
145 pre-go-behavior ( $8.2 \pm 1.7\%$ ), and pre-no-go behavior ( $4.2 \pm 0.7\%$ ) (bars in Fig. 2b). The  
146 relative contributions of the late go-cue odor sampling were significantly positive across  
147 71.9% of the go-cue odor-selective neurons (a pie chart in Fig. 2b). Furthermore, across the  
148 population, the go-cue responses during odor-sampling epochs in both correct and error trials

149 were higher than those in the no-go-cue correct and odorless trials (Fig. 2c), suggesting that  
150 the go-cue excitation responses mainly reflected signals of encoding cue-odor information.  
151 Notably, the intensities of the majority of the go-cue responses remained stable across trials  
152 (Fig. 2d). Taken together, the go-cue-preferred responses during the late phase of the  
153 odor-sampling epoch were considered to reflect the go-cue odor information.

154

### 155 **Response dynamics of the ACo neuron population during the late phase of** 156 **odor-sampling epoch**

157 We demonstrated that ACo neurons showed odor-evoked cue-preferred responses during the  
158 late phase of the odor-sampling epoch (Figs. 1-2). Were the distinct cue responses reflected in  
159 the ACo neuron population dynamics, and how much could the population activity account  
160 for animals' behavioral accuracy? First, to gain insight into the dynamics of the population  
161 response, we visualized average population activity using principal component analysis, a  
162 dimensionality reduction method. Fig. 3a shows trajectories of the mean response of the ACo  
163 neuron population to go-cue and no-go-cue odors, represented as projections onto the first  
164 three principal components (PC) during the odor-sampling epochs. Throughout the  
165 approximately 400 ms interval from the odor onset, trajectories remained converged, showing  
166 little difference across conditions. Over the late phase of odor-sampling epochs, trajectories  
167 in the odor-sampling epoch subspace began to spread out and were clearly separated at the  
168 population level. To quantify these observations, we measured the instantaneous separation  
169 between the population cue responses (Fig. 3b). The separation started to increase from 400  
170 ms after odor onset, reaching a maximum at ~800 ms, and remained above baseline levels  
171 until odor port exit. Thus, the ACo neuron population showed profound and persistent  
172 transformations in the dynamics of cue-encoding, 400 ms after odor onset.

173           Second, to examine whether the population activity accounted for the animals'  
174 behavioral accuracy, we performed a decoding analysis to determine whether the firing rates  
175 of the ACo neuron populations could be used to classify each individual trial as go or no-go.  
176 We used SVMs with linear kernels as a decoder. Based on ACo neurons, analyses of the  
177 decoding time course, using a sliding time window, revealed that decoding accuracy was first  
178 maintained at chance levels 400 ms after the odor onset, and then increased above the  
179 behavioral accuracy level of the animals around 500–600 ms after odor onset (the top-right  
180 graph in Fig. 3c). In the 700–800 ms period, about 100 neurons provided sufficient  
181 information to account for the behavioral accuracy (the bottom right graph in Fig. 3c). Thus,  
182 a hundred ACo neurons accounted for animals' behavioral accuracy in the late phase of odor  
183 sampling.

184

### 185 **Two types of reward anticipation responses of ACo neurons**

186 We then focused on the ACo activity during odor-evoked behaviors after an odor-sampling  
187 epoch. A subset of ACo neurons gradually increased their firing rates from the time of water  
188 port entry till the reward was received, and another subset of neurons increased their firing  
189 rates while waiting for reward (examples shown in Fig. 4a). We quantified the data by  
190 calculating firing rate changes from baseline (spike data were aligned to the water port entry),  
191 and three measures from the values: “time of center of mass”, “onset time”, and “duration”  
192 (from water port entry to 1000 ms after opening the water valve, Fig. 4b, see Materials and  
193 methods). The drinking epoch selective neurons ( $n = 30$ , 19.0 % of the recorded neurons)  
194 were defined as neurons that had the time of center of mass during the drinking epoch, and  
195 the waiting epoch selective neurons ( $n = 14$ , 8.9 % of the recorded neurons) were defined as  
196 neurons that had the time of center of mass during the waiting epoch. Across the population,



197 the drinking-epoch-selective neurons gradually increased their firing rates -190 ms before the  
198 water valve opened for 432 ms, and the waiting-epoch-selective neurons increased their firing  
199 rates 10 ms after water port entry for 108 ms (Figs. 4c-d,  $p < 0.01$ , permutation test). Thus,  
200 ACo neurons exhibited two distinct types of reward anticipation responses.

201

## 202 **Association of go-cue excitations with excitatory responses for the reward anticipation** 203 **behavior**

204 We observed that the waiting-epoch-selective neurons showed go-cue-preferred activity  
205 during the odor-sampling epoch; however, the drinking-epoch-selective neurons did not  
206 (examples shown in Fig. 5a). To examine the relationship between the reward anticipation  
207 responses and cue encoding, we quantified the response profiles of each neuron group during  
208 odor-evoked behaviors by calculating the firing rate changes from baseline (Fig. 5b). Across  
209 the population, drinking-epoch-selective neurons showed significant excitatory responses for  
210 the waiting and drinking epochs (red histogram at the top in Fig. 5b,  $p < 0.01$ , permutation  
211 test), and significant inhibitory responses for other behavioral epochs (blue histogram at the  
212 top in Fig. 5b,  $p < 0.01$ , permutation test). Alternatively, waiting-epoch-selective neurons  
213 showed significant excitatory responses for the late phase of go-cue odor-sampling and  
214 waiting epochs (red histogram at the bottom in Fig. 5b,  $p < 0.01$ , permutation test), and  
215 significant inhibitory responses for the drinking and no-go waiting epochs (blue histogram at  
216 the bottom in Fig. 5b,  $p < 0.01$ , permutation test). The waiting-epoch-selective neurons  
217 showed higher responses during the go-cue odor-sampling epoch than those of other groups  
218 (Fig. 5c, one-way analysis of variance with Tukey's post hoc test). Thus,  
219 waiting-epoch-selective neurons exhibited associations between the go-cue excitations and

220 excitatory responses for waiting behavior, suggesting that a subset of ACo neurons was  
221 involved in cue-outcome associations.

222

223

## 224 **Discussion**

225 The purpose of the study was to understand the electrophysiological features of ACo neurons  
226 on odor-evoked reward-related behavioral tasks. We found that many ACo neurons exhibited  
227 go-cue odor-preferred responses at the late phase of the odor-sampling epoch (Figs. 1-2).  
228 Consequently, the ACo population showed profound and persistent transformations in the  
229 dynamics of cue encoding, and provided sufficient information to account for the behavioral  
230 performance before executing the odor-evoked behaviors (Fig. 3). In addition to the late  
231 phase of odor-evoked activities, we also found two types of reward anticipation signals  
232 during the odor-evoked behaviors: ramp-like gradual increases in the signals to the reward  
233 exhibited by drinking-epoch-selective neurons, and phasic anticipation signals exhibited by  
234 waiting-epoch-selective-neurons (Fig. 4). The waiting-epoch-selective neurons exhibited  
235 associations between the go-cue excitations and excitatory responses for the waiting behavior  
236 (Fig. 5). Thus, the ACo showed unique encodings during various behavioral states in the task,  
237 suggesting that the ACo neurons play an important role in reward-related learning evoked by  
238 olfactory stimulus.

239

## 240 **Odor representation of the ACo**

241 The ACo was a previously unexplored area in the olfactory amygdala located caudally to the  
242 lateral olfactory tract and rostromedially to the posterolateral cortical nucleus of the amygdala.  
243 The projection from the olfactory bulb (OB) terminates in the outer portion of the most

244 superficial layer (layer Ia) of the cortex, and the projection from other olfactory cortex areas  
245 terminates in the deep portion of the ACo<sup>1415</sup>. Unlike other sensory systems, olfactory  
246 information from the external world reaches the amygdala without passing through thalamic  
247 areas. Therefore, the olfactory amygdala, including the ACo, receives olfactory information  
248 from the OB via the olfactory cortex<sup>1617</sup>. Moreover, previous comprehensive indirect  
249 evidence suggests that ACo may play a prominent role in reward-related behavioral learning  
250 from olfactory stimuli<sup>1819</sup>. However, little is known about the functions of the ACo in  
251 olfactory information processing. We performed *in vivo* recordings in the ACo neurons  
252 during the odor-guided go/no-go task to obtain a water reward. ACo neurons exhibited  
253 cue-odor-preferred responses at the late phase of odor-sampling epochs (Figs. 1,2, and 3).  
254 The peak firing in ACo neurons during odor-sampling epochs was later than that in other  
255 olfactory cortical areas (e.g., the piriform cortex<sup>20</sup>; and the ventral tenia tecta<sup>21</sup>). This late  
256 phase coding in the ACo neurons was not the premotor signal (Fig. 2). Population coding of  
257 ACo neurons showed profound and persistent transformations in the dynamics of  
258 cue-encoding, 400 ms after the odor onset (Fig. 3). This may reflect the input of other  
259 olfactory cortex from layers Ib, II, and III, and the top-down inputs from other brain areas,  
260 rather than the direct sensory inputs from OB in layer Ia. Therefore, we speculate that ACo  
261 neurons send task-modulated olfactory information to other amygdala areas.

262

### 263 **Role of reward-anticipation response in the waiting epoch**

264 ACo sends the axons massively to the basolateral amygdala complex (BLA)<sup>3</sup>. The BLA  
265 plays a role in learning and storing CS-US associations<sup>1819</sup>. Therefore, the projections from  
266 the ACo to the BLA may send olfactory information for the CS-US association in the  
267 odor-guided learning tasks. We demonstrated that some neurons exhibited

268 reward-anticipation responses in the waiting epoch and also showed a go-cue-odor preference  
269 (Fig. 5). Since the ACo receives direct inputs from the BLA <sup>3</sup>, it may also serve some  
270 function for the CS-US association by linking the olfactory information with the reward  
271 anticipation.

272 A previous study revealed that pyramidal neurons of the ACo displayed rhythmic  
273 fluctuations of the intrinsically generated voltage-dependent membrane potential in the  
274 theta-low beta range with the activation of sodium conductance <sup>9</sup>. Synchronizing theta  
275 oscillations have been found to increase between regions when enhanced communication  
276 occurs during memory acquisition <sup>2223</sup> and goal selection <sup>2425</sup>. Oscillatory synchronization for  
277 CS occurs in the theta band, between the lateral entorhinal cortex (LEC), which is a part of  
278 the olfactory cortex, and hippocampus (HPC), during the learning stage of trace CS-US  
279 associative learning tasks <sup>26</sup>. The ACo has bidirectional connections with the LEC <sup>3</sup>. We  
280 speculate that the ACo additionally drives the LEC-HPC circuit and supports the CS-US  
281 association by synchronizing the ACo-LEC-HPC theta oscillations during the learning stage.

282

### 283 **Role of reward-anticipation response in the drinking epoch**

284 In learning, reward signals have very important implications <sup>27</sup>. A subset of ACo neurons  
285 increased their firing rate during the drinking reward epoch (Fig. 4). These neurons started to  
286 increase their firing rate before the drinking epoch, and these activities persisted during the  
287 epoch. Previous studies reported that similar firing patterns were observed in the dopamine  
288 neurons in the VTA. Post learning, dopamine activity may change phasic responses to cues  
289 and rewards, and ramping activity may arise as the agent approaches the reward <sup>28</sup>. The ACo  
290 receives direct inputs from the VTA <sup>3</sup>. It is assumed that the ramping-like response in the  
291 ACo may reflect the inputs from the VTA. In addition, ACo has anatomical connections with

292 other olfactory cortices<sup>3</sup>. We speculate that the VTA reward signals may be transmitted to  
293 other olfactory cortical areas via ACo, making learning more efficient in the olfactory cortex.

294 A previous behavioral study revealed that electrical stimulation of the VTA showed  
295 that the ACo, besides other mesolimbic structures, displayed increased Fos expression in  
296 rats<sup>8</sup>. ACo sends excitatory glutamatergic/aspartatergic projections to the nucleus accumbens  
297 (NAc)<sup>29</sup>. Dopamine (DA) projections from the VTA to the NAc, which constitute the  
298 mesolimbic DA system<sup>303132</sup>, play an essential role in motivated behaviors, reinforcement  
299 learning, and reward processing<sup>333435</sup>. Therefore, the ACo may assist in driving the  
300 NAc-VTA circuit for reward-related behavior.

301

302

### 303 **Methods**

#### 304 **Animals**

305 All experiments were performed on adult male C57BL/6 mice purchased from Shimizu  
306 Laboratory Supplies Co., Ltd., Kyoto, Japan (9 weeks old; weighing 20–25 g). The mice were  
307 individually housed in a temperature-controlled environment with a 13-hr light 11-hr dark  
308 cycle (lights on at 08:00 and off at 21:00). They were provided water after training and  
309 recording sessions so that body weights dipped no lower than 85% of initial levels and food  
310 was supplied ad libitum. All experiments were performed in accordance with the guidelines for  
311 animal experiments at Doshisha University and with the approval of the Doshisha University  
312 Animal Research Committee.

313

#### 314 **Apparatus**

315 We used a behavioral apparatus controlled by the Bpod State Machine r0.5 (Sanworks LLC,

316 NY, USA), an open-source control device designed for behavioral tasks. The apparatus  
317 comprised of a custom-designed mouse behavior box with two nose-poke ports on the front  
318 wall. The box was contained in another soundproof box (BrainScience Idea. Co., Ltd., Osaka,  
319 Japan) equipped with a ventilator fan that provided adequate air circulation and low-level  
320 background noise. Each of the two nose-poke ports had a white light-emitting diode (LED) and  
321 an infrared photodiode. Interruption of the infrared beam generated a transistor-transistor-logic  
322 (TTL) pulse, thus signaling the entry of the mouse head into the port. The odor delivery port  
323 was equipped with a stainless steel tubing connected to a custom-made olfactometer <sup>36</sup>.  
324 Eugenol was used as the go-cue odor and amyl acetate (Tokyo Chemical Industry Co., Ltd.,  
325 Tokyo, Japan) as the no-go-cue odor respectively. These odors were diluted to 10% in mineral  
326 oil and further diluted 1:9 by airflow. Water-reward delivery was based on gravitational flow,  
327 controlled by a solenoid valve (The Lee Company, CT, USA), and connected via Tygon tubing  
328 to stainless steel tubing. The reward amount (6  $\mu$ L) was determined by the opening duration of  
329 the solenoid valve, which was regularly calibrated.

330

### 331 **Odor-Guided go/no-go task**

332 After a 3 s inter-trial interval, each trial began by illuminating the LED light at the right odor  
333 port, which instructed the mouse to poke its nose into that port. This resulted in the delivery of  
334 one of the two cue odors for 500 ms. Mice were required to keep their nose poked during odor  
335 stimulation to sniff the odor. After odor stimulation, the LED light was turned off and the mice  
336 could withdraw their nose from the odor port. If an eugenol odor (go-cue odor) was presented,  
337 the mice were required to move to the left water reward port and poke their nose within a  
338 timeout period of 2 s. At the water port, the mice were required to maintain their nose poke for  
339 300 ms before water delivery began. Next, 6  $\mu$ L of water was delivered as a reward. If an amyl

340 acetate odor (no-go-cue odor) was presented, the mice were required to avoid entering the  
341 water port for 2 s following odor stimulation. Once in 10 trials, we introduced catch trials in  
342 which the air stream was delivered through a filter containing no odorants during which the  
343 mice were not rewarded regardless of their choice (go or no-go behavior). During the training  
344 sessions, mice learned to obtain water rewards at the left water port, move from the right odor  
345 port to the left odor port, and associate odor cues with the correct action. The accuracy rate  
346 was calculated as the total percentage of successes in the go and no-go trials in a session. The  
347 mice performed up to 524 trials (go error: ~51 trials, no-go error: ~13 trials, catch: ~48 trials) in  
348 each session per day.

349

### 350 **Electrophysiology**

351 Mice were anesthetized with medetomidine (0.75 mg/kg i.p.), midazolam (4.0 mg/kg i.p.), and  
352 butorphanol (5.0 mg/kg i.p.), and implanted with a custom-built microdrive of four tetrodes in  
353 the ACo (0.1 mm anterior to the bregma, 2.2 mm lateral to the midline). Individual tetrodes  
354 consisted of four twisted polyimide-coated tungsten wires (California Fine Wire, single wire  
355 diameter 12.5  $\mu\text{m}$ , gold plated to less than 500 k $\Omega$ ). Two additional screws were threaded into  
356 the bone above the cerebellum for reference. The electrodes were connected to an electrode  
357 interface board (EIB-18, Neuralynx, MT, USA) on a microdrive. The microdrive array was  
358 fixed to the skull using LOCTITE 454 (Henkel Corporation, Düsseldorf, Germany). After the  
359 completion of surgery, the mice received atipamezole (0.75 mg/kg i.p.) to reverse the effects of  
360 medetomidine and to allow for a shorter recovery period. The mice also received analgesics  
361 (ketoprofen, 5 mg/kg, i.p.). Behavioral training resumed at least 1 week after surgery.  
362 Electrical signals were obtained using open-source hardware (Open Ephys). For unit  
363 recordings, signals were sampled at 30 kHz in Open Ephys and band-pass filtered at 600–6,000

364 Hz. After each recording, the tetrodes were adjusted to obtain new units.

365

### 366 **Data analyses**

367 All data analyses were performed using the built-in software in MATLAB 2019a (The  
368 Mathworks, Inc., MA, USA).

369

370 Spike sorting: Spikes were sorted into clusters offline using Kilosort2  
371 (<https://github.com/MouseLand/Kilosort2>), with default parameters. Kilosort2 sorted spikes  
372 on the basis of spike waveform similarity, the bimodality of the distribution of waveform  
373 features, and the spike auto- and cross-correlograms. A unit was considered a single unit if  
374 Kilosort2 categorized that unit as “good.” Additional analyses and spike waveform plotting  
375 with data were performed with MATLAB code modified from N. Steinmetz  
376 (<https://github.com/cortex-lab/spikes>). To assess the quality of our recordings, we checked all  
377 spike waveforms defined by the “good” units with Kilosort 2, and some single units that had  
378 strange waveforms were excluded from the analyses.

379

380 Spike train analyses: Neural and behavioral data were synchronized by inputting each event  
381 timestamp from the Bpod behavioral control system into the electric signal recording system.  
382 For calculation of firing rates during tasks, peri-event time histograms (PETHs) were  
383 calculated using a 20 ms bin width, and smoothed by convolving spike trains with a 60 ms wide  
384 Gaussian filter.

385

386 ROC analyses: To quantify the firing rate changes, we used an algorithm, based on ROC  
387 analyses, that calculates the ability of an ideal observer to classify whether a given spike rate



388 was recorded in one of two conditions (e.g., during go-cue or no-go-cue odor presentation)<sup>37</sup>.  
389 We defined an auROC equal to 2 (ROCArea – 0.5), with the measure ranging from –1 to 1,  
390 where –1 signifies the strongest possible value for one alternative and 1 signifies the strongest  
391 possible value for the other.

392 The statistical significance of these ROC analyses was determined using a  
393 permutation test. For this test, we recalculated ROC curves after randomly reassigning all  
394 firing rates to either of the two groups arbitrarily, repeated this procedure a large number of  
395 times (500 repeats for analyses of dynamics [Figs. 1e, 4b-c and 5b], 1000 repeats for all other  
396 analyses [Fig. 5c]) to obtain a distribution of values. We then calculated the fraction of random  
397 values exceeding the actual value. For all analyses, we tested for significance at  $\alpha = 0.01$ . Only  
398 neurons with a minimum number of three trials for each analyzed condition were included in  
399 the analyses.

400 For analyses of dynamics (width: 100 ms, step: 20 ms), we calculated three measures  
401 from the auROC values of correct trials (Figs. 4b and 4d):

402 (1) Time of center of mass: the time corresponding to the center of mass of the significant  
403 points of the auROC values ( $p < 0.01$ , permutation test). Only neurons with significant points  
404 for each analyzed condition were included in this analysis.

405 (2) Duration: The duration to the time of center of mass over which the auROC values were  
406 significant ( $p < 0.01$ , permutation test) for five or more consecutive bins, containing the time of  
407 center of mass. Only neurons with consecutive bins for each analyzed condition were included  
408 in this analysis.

409 (3) Onset time: The time at which the duration was first evident.

410

411 Generalized linear models: To quantify the contribution of behavioral variables to neural

412 activity, we used a generalized linear model (GLM), which was a multiple linear regression  
413 with the firing rate of each neuron as the dependent variable, and predictors derived from the  
414 behavioral variables as the independent variables (Fig. 2a and Supplementary Figs. 1a-c)<sup>13</sup>. In  
415 this analysis, the firing rate (20 ms bin width and smoothed by convolving spike trains with a  
416 60 ms wide Gaussian filter) of each neuron is described as a linear sum of temporal filters  
417 aligned to task events. For the current study, only odor stimulus onset, offset, and pre-odor port  
418 exit events were required, since we considered only the period between odor stimulus onset and  
419 500 ms after the odor port exit. In the model, the predicted firing rate is given as:

$$\hat{y}_t = \beta_0 + \sum_c \sum_i \beta_i^{E_{early}} x_{t-i}^{E_{early}} + \sum_c \sum_i \beta_i^{E_{late}} x_{t-i}^{E_{late}} + \sum_c \sum_i \beta_i^{E_{pre-exit}} x_{t-i}^{E_{pre-exit}}$$

420 The response of a neuron at bin  $t$  is modeled ( $\hat{y}_t$ ) by the sum of a bias term ( $\beta_0$ ) and the  
421 weighted ( $\beta_i$ ) sum of various additional binary predictors at different lags ( $i$ ), and  $c$  represents  
422 the two conditions (go or no-go trials). Binary predictors for the odor stimulus presentation  
423 ( $x_t^{E_{early}}$ ) are supported over the window 0 to 500 ms relative to the onset of odor valve in either  
424 go or no-go trials (lags corresponding to odor presentation period, 25 time bins) as well as late  
425 phase of odor-sampling predictors ( $x_t^{E_{late}}$ ) that are supported over the window 0 to 553/264 ms  
426 relative to the offset of the odor valve in either go or no-go trials (lags corresponding to the  
427 median durations between the odor valve offset and odor port exit, 28/14 time bins). Binary  
428 predictors for pre-odor port exit predictors ( $x_t^{E_{pre-exit}}$ ) are supported over the window -300 to 0  
429 ms relative to the odor port exit in either go or no-go trials (15 time bins). The  $\beta$  values were  
430 calculated using the glmfit MATLAB function.

431

432 Calculation of the relative contributions of behavioral variables to neural activity: We  
433 quantified the relative contribution of each behavioral variable to neural activity (Fig. 2b and

434 Supplementary Figs. 1d-f) by determining how the performance of the encoding model  
435 declined when each variable was excluded from the model<sup>1338</sup>. We predicted the firing rate of  
436 each neuron in either case with all variables (full model), or by excluding one of the variables  
437 (partial model), with fivefold cross-validation (over trials; meaning that in each fold, 80% of  
438 trials were used for training the model and the remaining trials were used for testing the model  
439 performance). The relative contribution of each behavioral variable was calculated by  
440 comparing the variance explained by the partial model to the variance explained by the full  
441 model. For the current study, which included six behavioral variables, the relative contribution  
442 of each variable was defined as

$$\left(1 - \frac{R_{p,i}^2}{R_f^2}\right) / \sum_{j=1}^6 \left(1 - \frac{R_{p,j}^2}{R_f^2}\right)$$

443 Here,  $R_{p,i}^2$  is the variance explained by the partial model that excludes the  $i$ th variable, and  $R_f^2$   
444 is variance explained by the full model. Negative relative contributions were set to zero (this  
445 occurs when the  $R^2$  of the full model is lower than that of the partial model, owing to the  
446 introduction of noise by the excluded variable).

447 We used two approaches to exclude variables from the full model and calculated the  
448 variance explained by the partial model<sup>13</sup>. In the first approach, the partial model was  
449 equivalent to the full model, except that the  $\beta$  values of the predictors of the excluded variable  
450 were set to zero ('no refitting'). In the second approach, we calculated new  $\beta$  values by  
451 re-running the regression without the predictors of the excluded variable (refitting). Both  
452 approaches to exclude variables produced comparable results; the no-refitting approach was  
453 used to generate the main figures, and comparison with the refitting approach is shown in  
454 Supplementary Fig. 1d.

455 Moreover, we compared relative contributions as assessed separately using three

456 different approaches: no refitting (NR; used in the paper), no refitting + Lasso regularization  
457 (NR + L), and refitting (R). Lasso regularization was applied using the lasso function in  
458 MATLAB; the mean square error (MSE) of the model was estimated using fivefold  
459 cross-validation, and we chose the lambda value that minimized the MSE. The results obtained  
460 with lasso regularization were almost identical to those obtained without regularization  
461 (Supplementary Fig. 1d), which suggested that there was no significant overfitting in our  
462 model.

463 Finally, to evaluate the significance of relative contributions assessed by the  
464 no-refitting approach, we calculated the control values. In this approach, the partial model was  
465 equivalent to the full model, except that the randomly selected  $\beta$  values of the predictors of the  
466 excluded variable (10% of predictors, mostly corresponding to the sum of time bins of each  
467 behavioral predictor) were set to zero, in which case, processing was performed 1,000 times  
468 (Supplementary Figs. 1e-f). Using the control mean  $\pm$  2 standard deviation (SD), the statistical  
469 significance was determined ( $<$  mean  $-$  2SD, negative relative contribution;  $>$  mean  $+$  2SD,  
470 positive relative contribution).

471

472 Population vector construction and analyses: We constructed 2 conditions (91 time bins)  $\times$  158  
473 neurons matrix<sup>394041</sup> during the odor-sampling epoch, in which columns contained the auROC  
474 values of the correct trials, corresponding to the trial-averaged firing rate changes from  
475 baseline (Supplementary Fig. 2a). By performing principal component analysis (PCA) on the  
476 dataset, we reduced the dimensionality of the ACo population from 158 neurons to three  
477 principal components (PCs), and obtained the odor-sampling epoch subspaces. Note that we  
478 used the three subspaces because they explained 80.6% of the total variance (Supplementary  
479 Fig. 2b). To visualize the ACo population responses, we projected the dataset onto

480 three-dimensional subspaces (Fig. 3a). This allowed us to obtain a point reflecting the entire  
481 population response for each of the two conditions at a given instance. The distance between  
482 cue responses was computed as the Euclidean distance between pairs of activity vectors of all  
483 subspaces at a given instant (Fig. 3b)<sup>4243</sup>. This value was compared with the values during the  
484 baseline epoch (1200 to 1000 ms before the odor port entry).

485

486 SVM decoding analyses: We used a support vector machine (SVM) algorithm with a linear  
487 kernel as a classifier<sup>2042</sup> and a MATLAB function (fitsvm) for analyses. All analyses were  
488 conducted on trial data pooled across animals. A matrix containing concatenated firing rates  
489 for each trial was used, and each neuron was the input to the classifier. The matrix dimensions  
490 were the number of neurons by the number of trials. To avoid over-fitting, k-fold  
491 cross-validation (k = 10) was used to calculate the decoding accuracy of trial type  
492 discrimination. To compute decoding accuracy, forty trials for each trial type (from the start of  
493 the session) were chosen as the dataset. Next, the dataset was partitioned into ten equal parts;  
494 one part was used for testing, and the remaining parts were used for training the classifier. This  
495 process was repeated ten times to test each individual part, and the mean value of the accuracy  
496 was used for decoding accuracy. To compute the decoding accuracy of a 100 ms bin window  
497 (step: 20 ms), the classifier was trained and tested with a 100 ms bin window (step: 20 ms).

498

499 Statistical analyses: Data were analyzed using MATLAB 2019a. Statistical methods in each  
500 analysis are described above, in the result section, or in the figure legends. The Tukey-Kramer  
501 method was applied for significance tests with multiple comparisons. Sample sizes in this  
502 study were not pre-determined by calculation, they were based on previous research in the  
503 olfactory cortex fields<sup>2044</sup>. Randomization and blinding were not employed. Biological

504 replicates for the histological studies are described in the figure legends.

505

## 506 **Histology**

507 After recording, the mice were deeply anesthetized by intraperitoneal injection of sodium  
508 pentobarbital. Electric lesions were made using 10–20  $\mu$ A direct current stimulation for 5 s of  
509 one of the four tetrode leads. Mice were perfused transcardially with phosphate-buffered saline  
510 (PBS) and 4% paraformaldehyde (PFA). Brains were removed from the skull and post-fixed in  
511 PFA. Brains were then cut into 50- $\mu$ m-thick coronal sections and stained with cresyl violet.  
512 Electrode track positions were determined in reference to the atlas developed by Paxinos and  
513 Watson <sup>45</sup>.

514

515

## 516 **Data availability**

517 The data that support the findings of this study are available from the corresponding author  
518 upon reasonable request.

519

520

## 521 **Code availability**

522 The custom code used for the analyses in the present study is available from the  
523 corresponding authors upon reasonable request.

524

525

## 526 **References**

527 1. Ehrlichman, H. & Bastone, L. Olfaction and Emotion BT - Science of Olfaction. in

- 528 (eds. Serby, M. J. & Chobor, K. L.) 410–438 (Springer New York, 1992).  
529 doi:10.1007/978-1-4612-2836-3\_15
- 530 2. Soudry, Y., Lemogne, C., Malinvaud, D., Consoli, S.-M. & Bonfils, P. Olfactory  
531 system and emotion: Common substrates. *Eur. Ann. Otorhinolaryngol. Head Neck Dis.*  
532 **128**, 18–23 (2011).
- 533 3. Cádiz-Moretti, B., Abellán-Álvaro, M., Pardo-Bellver, C., Martínez-García, F. &  
534 Lanuza, E. Afferent and efferent projections of the anterior cortical amygdaloid  
535 nucleus in the mouse. *J. Comp. Neurol.* **525**, 2929–2954 (2017).
- 536 4. Zhou, G., Lane, G., Cooper, S. L., Kahnt, T. & Zelano, C. Characterizing functional  
537 pathways of the human olfactory system. *Elife* **8**, (2019).
- 538 5. Haberly, L. B. Parallel-distributed Processing in Olfactory Cortex: New Insights from  
539 Morphological and Physiological Analysis of Neuronal Circuitry. *Chem. Senses* **26**,  
540 551–576 (2001).
- 541 6. Mori, K. & Sakano, H. How is the olfactory map formed and interpreted in the  
542 mammalian brain? *Annu Rev Neurosci* **34**, 467–499 (2011).
- 543 7. Sevelinges, Y., Gervais, R., Messaoudi, B., Granjon, L. & Mouly, A.-M. Olfactory  
544 fear conditioning induces field potential potentiation in rat olfactory cortex and  
545 amygdala. *Learn. Mem.* **11**, 761–769 (2004).
- 546 8. Majkutewicz, I. *et al.* Lesion of the ventral tegmental area amplifies  
547 stimulation-induced Fos expression in the rat brain. *Brain Res.* **1320**, 95–105 (2010).
- 548 9. Sanhueza, M. & Bacigalupo, J. Intrinsic subthreshold oscillations of the membrane  
549 potential in pyramidal neurons of the olfactory amygdala. *Eur. J. Neurosci.* **22**,  
550 1618–1626 (2005).

- 551 10. Steinmetz, N. A., Zatzka-Haas, P., Carandini, M. & Harris, K. D. Distributed coding of  
552 choice, action and engagement across the mouse brain. *Nature* **576**, 266–273 (2019).
- 553 11. Allen, W. E. *et al.* Thirst regulates motivated behavior through modulation of  
554 brainwide neural population dynamics. *Science* (80-. ). **364**, eaav3932 (2019).
- 555 12. Parker, P. R. L., Brown, M. A., Smear, M. C. & Niell, C. M. Movement-Related  
556 Signals in Sensory Areas: Roles in Natural Behavior. *Trends Neurosci.* **43**, 581–595  
557 (2020).
- 558 13. Engelhard, B. *et al.* Specialized coding of sensory, motor and cognitive variables in  
559 VTA dopamine neurons. *Nature* **570**, 509–513 (2019).
- 560 14. Scalia, F. & Winans, S. S. The differential projections of the olfactory bulb and  
561 accessory olfactory bulb in mammals. *J. Comp. Neurol.* **161**, 31–55 (1975).
- 562 15. Carmichael, S. T., Clugnet, M. C. & Price, J. L. Central olfactory connections in the  
563 macaque monkey. *J. Comp. Neurol.* **346**, 403–434 (1994).
- 564 16. Price, J. L. An autoradiographic study of complementary laminar patterns of  
565 termination of afferent fibers to the olfactory cortex. *J. Comp. Neurol.* **150**, 87–108  
566 (1973).
- 567 17. McDonald, A. J. Cortical pathways to the mammalian amygdala. *Prog. Neurobiol.* **55**,  
568 257–332 (1998).
- 569 18. Adhikari, A. *et al.* Basomedial amygdala mediates top-down control of anxiety and  
570 fear. *Nature* **527**, 179–185 (2015).
- 571 19. Gore, F. *et al.* Neural Representations of Unconditioned Stimuli in Basolateral  
572 Amygdala Mediate Innate and Learned Responses. *Cell* **162**, 134–145 (2015).



- 573 20. Miura, K., Mainen, Z. F. & Uchida, N. Odor representations in olfactory cortex:  
574 distributed rate coding and decorrelated population activity. *Neuron* **74**, 1087–1098  
575 (2012).
- 576 21. Shiotani, K. *et al.* Tuning of olfactory cortex ventral tenia tecta neurons to distinct task  
577 elements of goal-directed behavior. *Elife* **9**, (2020).
- 578 22. Hoffmann, L. C. & Berry, S. D. Cerebellar theta oscillations are synchronized during  
579 hippocampal theta-contingent trace conditioning. *Proc. Natl. Acad. Sci. U. S. A.* **106**,  
580 21371–21376 (2009).
- 581 23. Wikgren, J., Nokia, M. S. & Penttonen, M. Hippocampo-cerebellar theta band phase  
582 synchrony in rabbits. *Neuroscience* **165**, 1538–1545 (2010).
- 583 24. Jones, M. W. & Wilson, M. A. Theta rhythms coordinate hippocampal-prefrontal  
584 interactions in a spatial memory task. *PLoS Biol.* **3**, e402 (2005).
- 585 25. Benchenane, K. *et al.* Coherent theta oscillations and reorganization of spike timing in  
586 the hippocampal-prefrontal network upon learning. *Neuron* **66**, 921–936 (2010).
- 587 26. Takehara-Nishiuchi, K., Maal-Bared, G. & Morrissey, M. D. Increased  
588 Entorhinal-Prefrontal Theta Synchronization Parallels Decreased  
589 Entorhinal-Hippocampal Theta Synchronization during Learning and Consolidation of  
590 Associative Memory. *Front. Behav. Neurosci.* **5**, 90 (2011).
- 591 27. Glimcher, P. W. Understanding dopamine and reinforcement learning: the dopamine  
592 reward prediction error hypothesis. *Proc. Natl. Acad. Sci. U. S. A.* **108 Suppl**,  
593 15647–15654 (2011).
- 594 28. Song, M. R. & Lee, S. W. Dynamic resource allocation during reinforcement learning  
595 accounts for ramping and phasic dopamine activity. *Neural Netw.* **126**, 95–107

- 596 (2020).
- 597 29. Ray, J. P., Russchen, F. T., Fuller, T. A. & Price, J. L. Sources of presumptive  
598 glutamatergic/aspartatergic afferents to the mediodorsal nucleus of the thalamus in  
599 the rat. *J. Comp. Neurol.* **320**, 435–456 (1992).
- 600 30. Björklund, A. & Dunnett, S. B. Dopamine neuron systems in the brain: an update.  
601 *Trends Neurosci.* **30**, 194–202 (2007).
- 602 31. Ikemoto, S. Dopamine reward circuitry: two projection systems from the ventral  
603 midbrain to the nucleus accumbens-olfactory tubercle complex. *Brain Res. Rev.* **56**,  
604 27–78 (2007).
- 605 32. Morales, M. & Margolis, E. B. Ventral tegmental area: cellular heterogeneity,  
606 connectivity and behaviour. *Nat. Rev. Neurosci.* **18**, 73–85 (2017).
- 607 33. Hamid, A. A. *et al.* Mesolimbic dopamine signals the value of work. *Nat. Neurosci.* **19**,  
608 117–126 (2016).
- 609 34. Salamone, J. D. & Correa, M. The mysterious motivational functions of mesolimbic  
610 dopamine. *Neuron* **76**, 470–485 (2012).
- 611 35. Watabe-Uchida, M., Eshel, N. & Uchida, N. Neural Circuitry of Reward Prediction  
612 Error. *Annu. Rev. Neurosci.* **40**, 373–394 (2017).
- 613 36. Uchida, N. & Mainen, Z. F. Speed and accuracy of olfactory discrimination in the rat.  
614 *Nat. Neurosci.* **6**, 1224–1229 (2003).
- 615 37. Felsen, G. & Mainen, Z. F. Neural Substrates of Sensory-Guided Locomotor Decisions  
616 in the Rat Superior Colliculus. *Neuron* **60**, 137–148 (2008).
- 617 38. Pho, G. N., Goard, M. J., Woodson, J., Crawford, B. & Sur, M. Task-dependent

- 618 representations of stimulus and choice in mouse parietal cortex. *Nat. Commun.* **9**, 2596  
619 (2018).
- 620 39. Murray, J. D. *et al.* Stable population coding for working memory coexists with  
621 heterogeneous neural dynamics in prefrontal cortex. *Proc. Natl. Acad. Sci. U. S. A.*  
622 **114**, 394–399 (2017).
- 623 40. Cavanagh, S. E., Towers, J. P., Wallis, J. D., Hunt, L. T. & Kennerley, S. W.  
624 Reconciling persistent and dynamic hypotheses of working memory coding in  
625 prefrontal cortex. *Nat. Commun.* **9**, 3498 (2018).
- 626 41. Ohnuki, T., Osako, Y., Manabe, H., Sakurai, Y. & Hirokawa, J. Dynamic coordination  
627 of the perirhinal cortical neurons supports coherent representations between task  
628 epochs. *Commun. Biol.* **3**, 406 (2020).
- 629 42. Cury, K. M. & Uchida, N. Robust odor coding via inhalation-coupled transient activity  
630 in the mammalian olfactory bulb. *Neuron* **68**, 570–585 (2010).
- 631 43. Mazor, O. & Laurent, G. Transient dynamics versus fixed points in odor  
632 representations by locust antennal lobe projection neurons. *Neuron* **48**, 661–673  
633 (2005).
- 634 44. Manabe, H., Kusumoto-Yoshida, I., Ota, M. & Mori, K. Olfactory cortex generates  
635 synchronized top-down inputs to the olfactory bulb during slow-wave sleep. *J.*  
636 *Neurosci.* **31**, 8123–8133 (2011).
- 637 45. Paxinos, G. *The mouse brain in stereotaxic coordinates* / George Paxinos, Keith  
638 *Franklin.* (Academic, 2004).

639

640

641 **Acknowledgments**

642 We thank Nozomi Fukui for assistance with data collection and the lab members for valuable  
643 discussions. We thank Hideki Tanisumi for providing illustrations in the figures. H.M. was  
644 supported by the Takeda Science Foundation and JSPS KAKENHI Grant Numbers 25135708  
645 and 16K14557. Y.S. was supported by JSPS KAKENHI Grant Numbers 20H00109 and  
646 20H05020.

647

648

649 **Author contributions**

650 K.S., Y.T., and H.M. designed the experiments, and K.S., Y.T., and H.M. performed the  
651 experiments. K.S., Y.T., J.H., and H.M. performed the data analysis. K.S., Y.T., and H.M.  
652 wrote the paper. Y.S. supported and advised the project.

653

654

655 **Competing interests**

656 No conflicts of interest, financial or otherwise, are declared by the authors.

657

658

659 **Figure legends**

660 **Fig. 1. Cue-Odor-preferred responses of ACo neurons during the late phase of**  
661 **odor-sampling in the odor-guided go/no-go task.**

662 (a) Time course of the odor-guided go/no-go task. Behavioral epoch temporal progression  
663 from left to right.

664 (b) Nissl-stained frontal section (an arrow indicates recording track) and recording tracks

665 (vertical thick lines) of the ACo. NLOT, nucleus of lateral olfactory tract. CxA,  
666 cortex-amygdala transition zone. APC, anterior piriform cortex. Scale bar: 500  $\mu$ m.

667 (c) Example firing patterns of ACo neurons during odor-sampling epoch (the time from odor  
668 valve opening to odor port exit) in the odor-guided go/no-go task. Each row contains spikes  
669 (black ticks) for one trial, aligned to the time of odor valve opening (corresponding to odor  
670 port entry, orange ticks). Red ticks represent times of odor port exit. Correct trials are  
671 grouped by odor, and within each group, are sorted by the duration of the odor-sampling  
672 epoch (50 selected trials from the end of the session are shown per category). Histograms are  
673 averaged across odors, and calculated using a 20 ms bin width and smoothed by convolving  
674 spike trains with a 60 msec-wide Gaussian filter (blue, go-cue odor; green, no-go-cue odor).  
675 Vertical dashed lines indicate the time of odor valve opening.

676 (d) Normalized firing rates (auROC values) for go-cue selective neurons ( $n = 57$ ). auROC  
677 values (aligned by odor valve opening) were calculated by go-cue odor presentation versus  
678 baseline (left) and no-go-cue odor presentation versus baseline (right) in the sliding bins  
679 (width, 100 ms; step, 20 ms). Red, increase from baseline; blue, decrease from baseline. Each  
680 row corresponds to one neuron, with neurons in the left and right graphs in the same order.  
681 Neurons are sorted by the peak time for auROC values calculated by go-cue odor  
682 presentation versus baseline.

683 (e) Cue preference curves (auROC values, go-cue versus no-go-cue odor presentation,  
684 aligned by odor valve opening, odor port exit) for go-cue selective neurons. Each row  
685 corresponds to one neuron, with neurons in the left and right graphs in the same order of (d).  
686 Color scale indicates significant preferences ( $p < 0.01$ , permutation test; positive values  
687 correspond to the go-cue preferred responses). The black boxes indicate bins with  
688 non-significant preferences ( $p > 0.01$ , permutation test).

689

690 **Fig. 2. Late go-cue odor-preferred responses were evoked by the odor onsets and were**  
691 **stable.**

692 (a) Schematic of the encoding model used to quantify the relationship between behavioral  
693 variables and the activity of each neuron (see Materials and methods). Behavioral predictors  
694 for the odor stimulus-presentation epoch are supported over the window 0 to 500 ms relative  
695 to the onset of odor valve, as well as late phase of odor-sampling epoch that are supported  
696 over the window 0 to 553/264 ms relative to the offset of odor valve in either go/no-go trials  
697 (median of the valve offset to odor port exit), and pre odor port exit epoch that are supported  
698 over the window -300 to 0 ms relative to the odor port exit. Inset, predicted and actual  
699 averaged firing rate relative to the odor onset and odor port exit for one neuron.

700 (b) Top: relative contribution of each behavioral variable to the explained variance of the  
701 neural activity, averaged across the go-cue-selective neurons. All error bars represent the  
702 standard error of the mean. Bottom: relative contribution significance of the late phase of  
703 go-cue odor-sampling variable; see Supplementary Fig. 1f for the other variables.

704 (c) Go-cue odor-preferred responses during correct trials, error trials, and catch (odorless)  
705 trials. The auROC values were calculated during the odor-sampling epochs and only neurons  
706 with a minimum number of three trials for each analyzed condition were included in this  
707 analysis. Black horizontal lines and black vertical lines indicate medians and interquartile  
708 ranges. The statistical significance among five groups (\* $p < 0.05$ , \*\* $p < 0.01$ , \*\*\* $p < 0.001$ )  
709 was assessed by one-way analysis of variance (ANOVA) with Tukey's post hoc test.

710 (d) The development of go-cue responses in go-cue-selective neurons during learning. For  
711 each go-cue-selective neuron, we calculated the correlation between the firing rate during the  
712 go-cue odor-sampling epoch relative to the baseline (a mean firing rate during inter trial

713 interval was subtracted for each neuron) and the order of go trial from the start of the session.  
714 The correlation coefficient was compared with control values calculated by the 1000  
715 trial-shuffled data (gray shaded area) and then the statistical significance was determined (<  
716 0.5<sup>th</sup> percentiles of the control values, negative correlation; > 99.5<sup>th</sup> percentiles of the control  
717 values, positive correlation). Across go-cue-selective neurons, the majority of the go-cue  
718 responses were not correlated with trial progression (86.0%, not significant; 7.0%, negative;  
719 7.0%, positive).

720

721 **Fig. 3. Dynamics of ACo neuron population response during the late phase of**  
722 **odor-sampling.**

723 (a) Visualization of ACo neuron population responses during odor-sampling epoch using  
724 principal component analysis (158 neurons). The responses to cue odors are projected onto  
725 the first three principal components corresponding to odor-sampling epoch subspaces. Blue  
726 line, go-cue odor; green line, no-go-cue odor. Temporal progression from unfilled blue/green  
727 spheres to filled spheres.

728 (b) Distance between ACo neuron population responses. Gray line and shaded area show  
729 mean  $\pm$  2SD baseline values during pre-odor-sampling epoch. Top dots indicate time bins  
730 showing values more than mean + 2SD baseline values.

731 (c) The time course of odor decoding accuracy. A vector consisting of instantaneous spike  
732 counts for 1–158 neurons in a sliding window (width, 100 ms; step, 20 ms) was used as input  
733 for the classifier. Training of the classifier and testing were done at every time point. Green  
734 horizontal lines indicate the level of animal behavioral performance. Gray horizontal lines  
735 indicate chance level (50%). Green vertical dashed lines indicate the first points at which the  
736 decoding accuracy reached the level of animal behavioral performance. Shaded areas

737 represent  $\pm$  SD.

738

739 **Fig. 4. Two types of reward-related responses of ACo neurons.**

740 (a) Example firing patterns of reward-related responses. Spike histograms are calculated  
741 using a 20 ms bin width and smoothed by convolving spike trains with a 60 ms wide  
742 Gaussian filter. A vertical black line indicates the water valve opening.

743 (b) Evaluation of the reward-related responses. Normalized firing rates (auROC values) were  
744 calculated by go-behavior versus baseline in the sliding bins (width, 100 ms; step, 20 ms).  
745 Left: red bars show significant excitation ( $p < 0.01$ , permutation test). Based on the  
746 significant time points, onset time (black triangle), time of center of mass (black circle) and  
747 duration (black horizontal line) were calculated. Vertical black lines indicate the water valve  
748 opening. Right: each row corresponds to one neuron and neurons are sorted by times of  
749 center of mass (white dots) of auROC values. Based on the times of center of mass,  
750 drinking-selective neurons and waiting-selective neurons were defined (a horizontal dashed  
751 line). Color scale as in Fig. 1d. Vertical white lines indicate the water port entry and the water  
752 valve opening.

753 (c) The proportions of neurons that exhibited a significant response, calculated from auROC  
754 values ( $p < 0.01$ , permutation test) for each neuron group (orange, drinking selective neurons;  
755 brown, waiting selective neurons). Vertical black lines indicate the water valve opening.

756 (d) Distributions of the times of center of mass, onset times and durations (orange,  
757 drinking-selective neurons; brown, waiting-selective neurons).

758

759 **Fig. 5. Waiting-selective neurons also showed go-cue odor-preferred responses during**  
760 **odor-sampling.**



761 (a) Example firing patterns of cue-outcome responses. Spike histograms are calculated using  
762 a 20 ms bin width and smoothed by convolving spike trains with a 60 ms wide Gaussian filter.  
763 A vertical black line indicates the water valve opening.

764 (b) The proportions of neurons that exhibited significant excitatory and inhibitory response  
765 calculated from auROC values ( $p < 0.01$ , permutation test) for each neuron group. Vertical  
766 black lines indicate the water valve opening.

767 (c) auROC values during odor-sampling epoch of go-cue odor-selective responses (top graph)  
768 and no-go-cue odor-selective responses (bottom graph) for each neuron group. Black  
769 horizontal lines and black vertical lines indicate medians and interquartile ranges. Red dots,  
770 significant excitation; blue dots, significant inhibition; gray dots, non-significant ( $p < 0.01$ ,  
771 permutation test). Statistical significance among three groups ( $***P < 0.001$ ) was assessed by  
772 one-way analysis of variance (ANOVA) with Tukey's post hoc test.

773

774

### 775 **Supplementary figure legends**

776 **Supplementary Fig. 1. Generalized linear models and the relative contributions of**  
777 **behavioral variables to neural activity.**

778 (a) Schematic of the encoding model used to quantify the relationship between behavioral  
779 variables and the activity of each neuron. Inset, predicted and actual averaged firing rate  
780 relative to the odor onset and odor port exit for one neuron.

781 (b) Structure of predictor matrices. The predictor has columns for each variable, which take  
782 non-zero values for time bins (rows) corresponding to the appropriate time offset from the  
783 given event.

784 (c) Variance explained ( $R^2$  of PSTH reconstructions) between predicted and actual averaged

785 firing rate relative to the odor onset and odor port exit across the go-cue-selective neurons.

786 **(d)** Average relative contributions across the go-cue-selective neurons assessed separately  
787 using three different approaches: no refitting (used in the paper); no refitting + Lasso  
788 regularization; and refitting. Lasso regularization was applied using the lasso function in  
789 MATLAB; the mean square error (MSE) of the model was estimated using fivefold  
790 cross-validation, and we chose the lambda value that minimized the MSE. The results with  
791 lasso regularization were almost identical to the result without regularization, which suggests  
792 that there was no significant overfitting in our model.

793 **(e)** Evaluation for significance of relative contributions assessed no refitting approach. The  
794 partial model was equivalent to the full model, except that the randomly selected  $\beta$  values of  
795 the predictors of the excluded variable (10% of predictors) were set to zero, in which  
796 processing was performed 1,000 times. Using the control mean  $\pm$  2 standard deviation (SD),  
797 the statistical significance was determined ( $<$  mean  $-$  2SD, negative relative contribution;  $>$   
798 mean  $+ 2SD$ , positive relative contribution).

799 **(f)** Proportions of the significance of relative contributions for each behavioral variable across  
800 the go-cue-selective neurons.

801

802 **Supplementary Fig. 2. Population vector construction and analyses for ACo neuron**  
803 **population response.**

804 **(a)** Population vector construction. We constructed the two conditions (91 time bins)  $\times$  158  
805 neurons matrix during the odor-sampling epoch, within which, the columns contained the  
806 auROC values corresponding to the trial-averaged firing rate changes from the baseline. By  
807 performing principal component analysis (PCA) on the dataset, we reduced the  
808 dimensionality of the ACo population from 158 neurons to three principal components (PCs).

809 Subsequently, we obtained the odor-sampling epoch subspaces (graphs show the values of  
810 the first dimension of the odor-sampling epoch subspaces).

811 **(b)** Screen plot of the odor-sampling epoch subspaces. It is notable that we used the three  
812 subspaces because they explained 80.6% of the total variance.

813

814

a

## Go / No-Go task

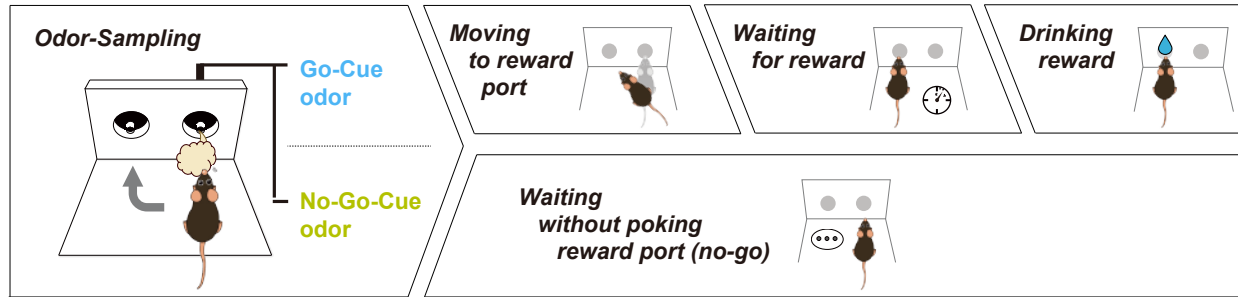

b

## Anterior cortical amygdaloid nucleus (ACo)

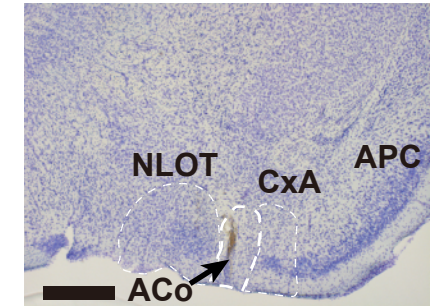

c

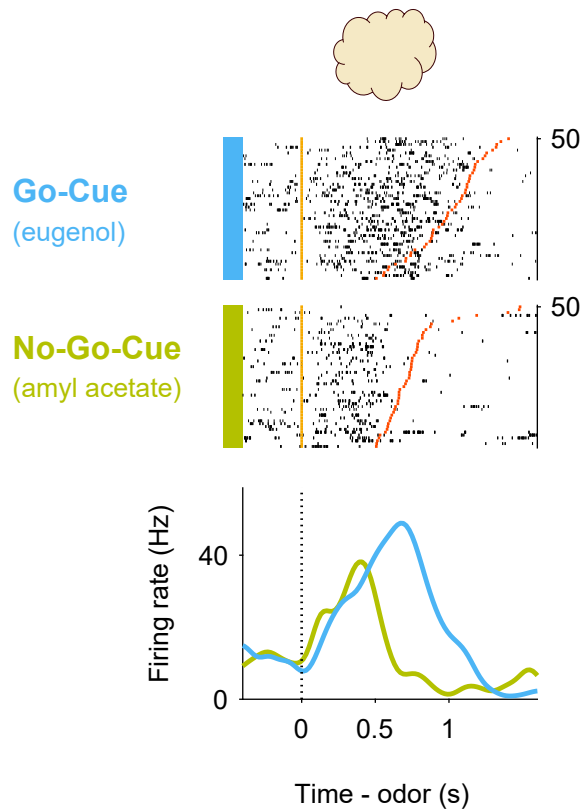

d

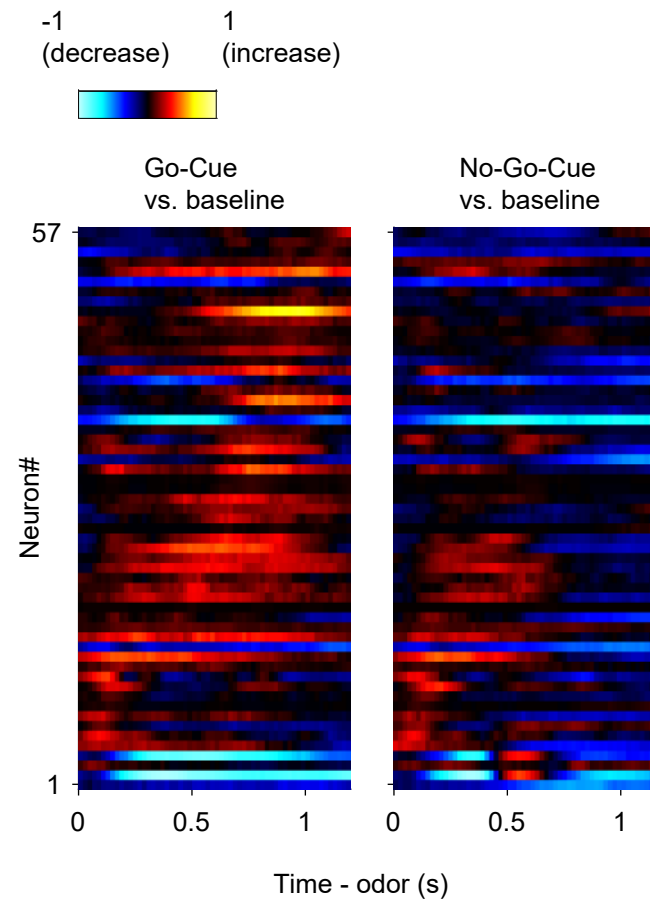

e

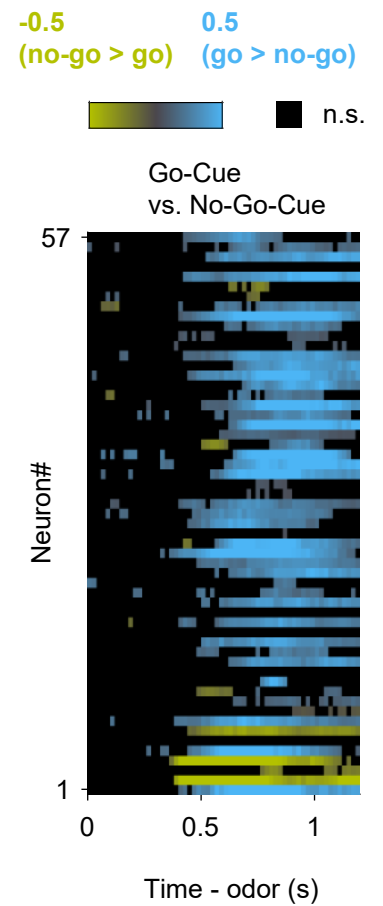

Fig. 1

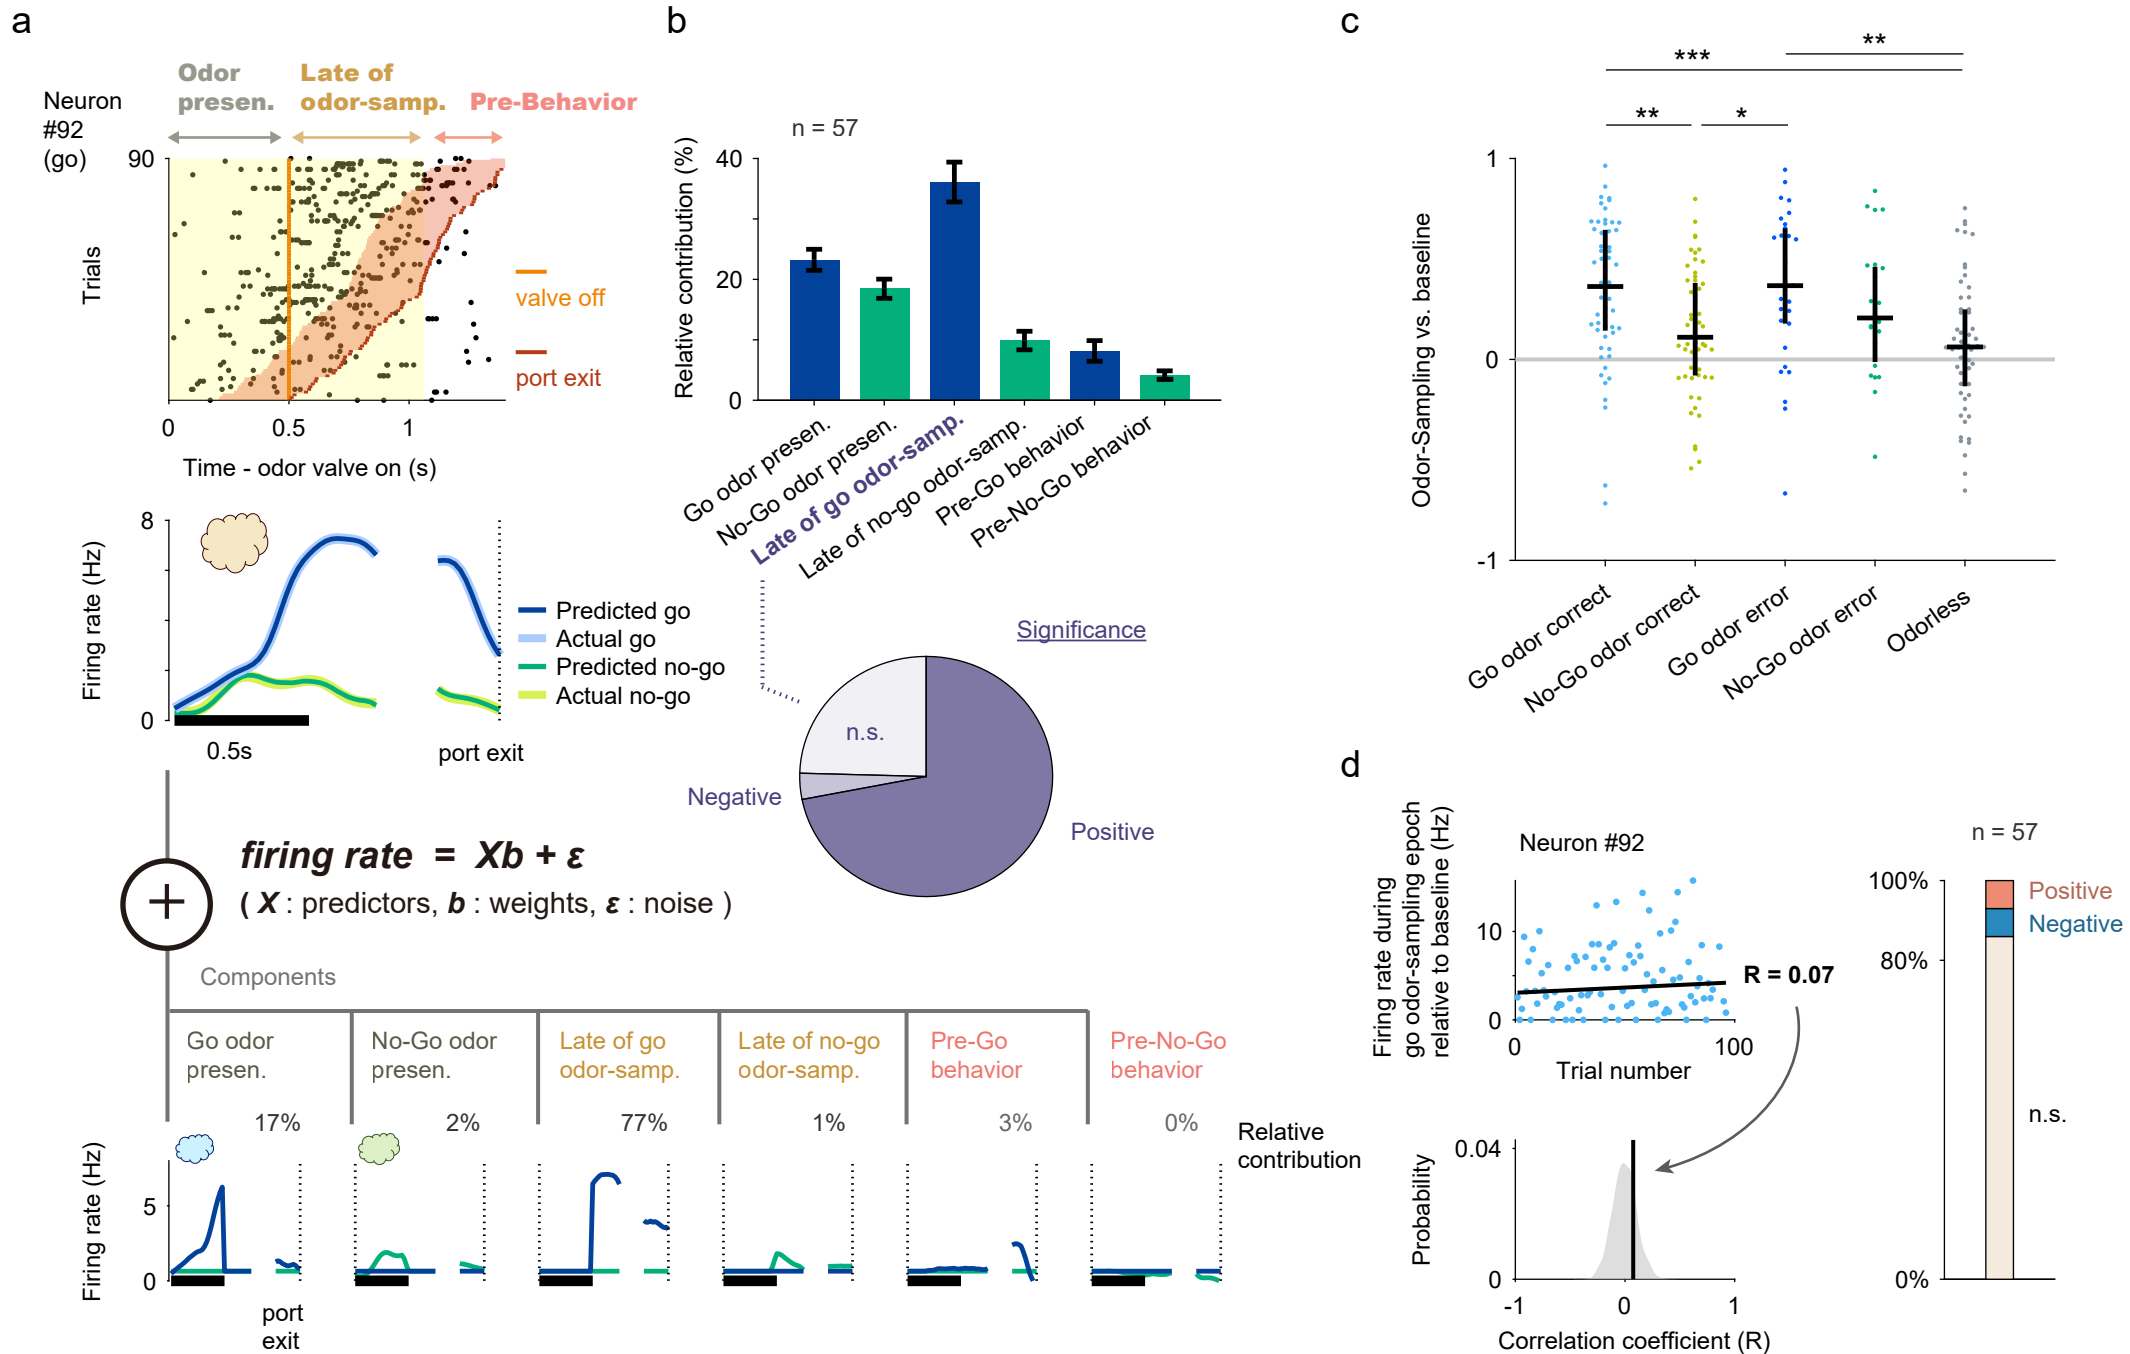

**Fig. 2**

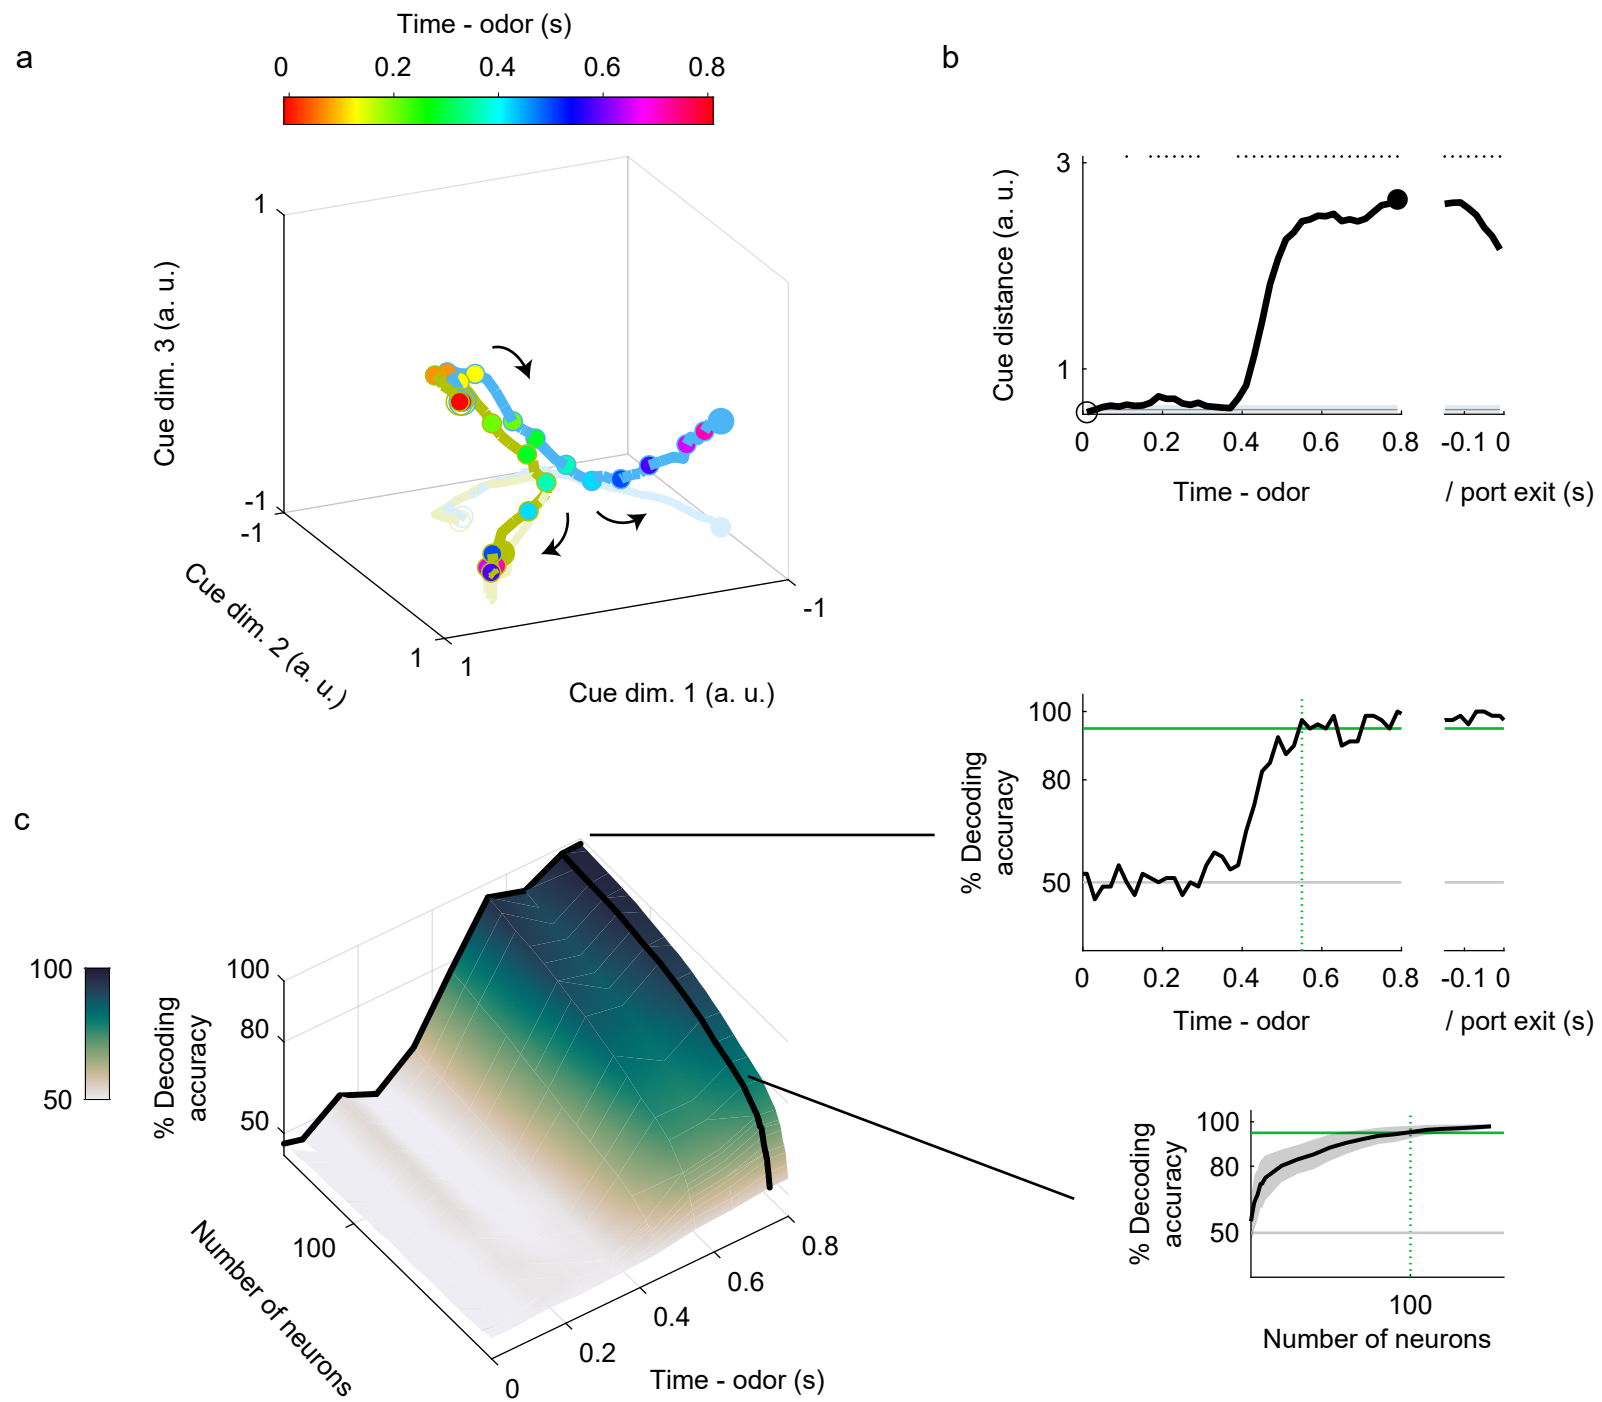

**Fig. 3**

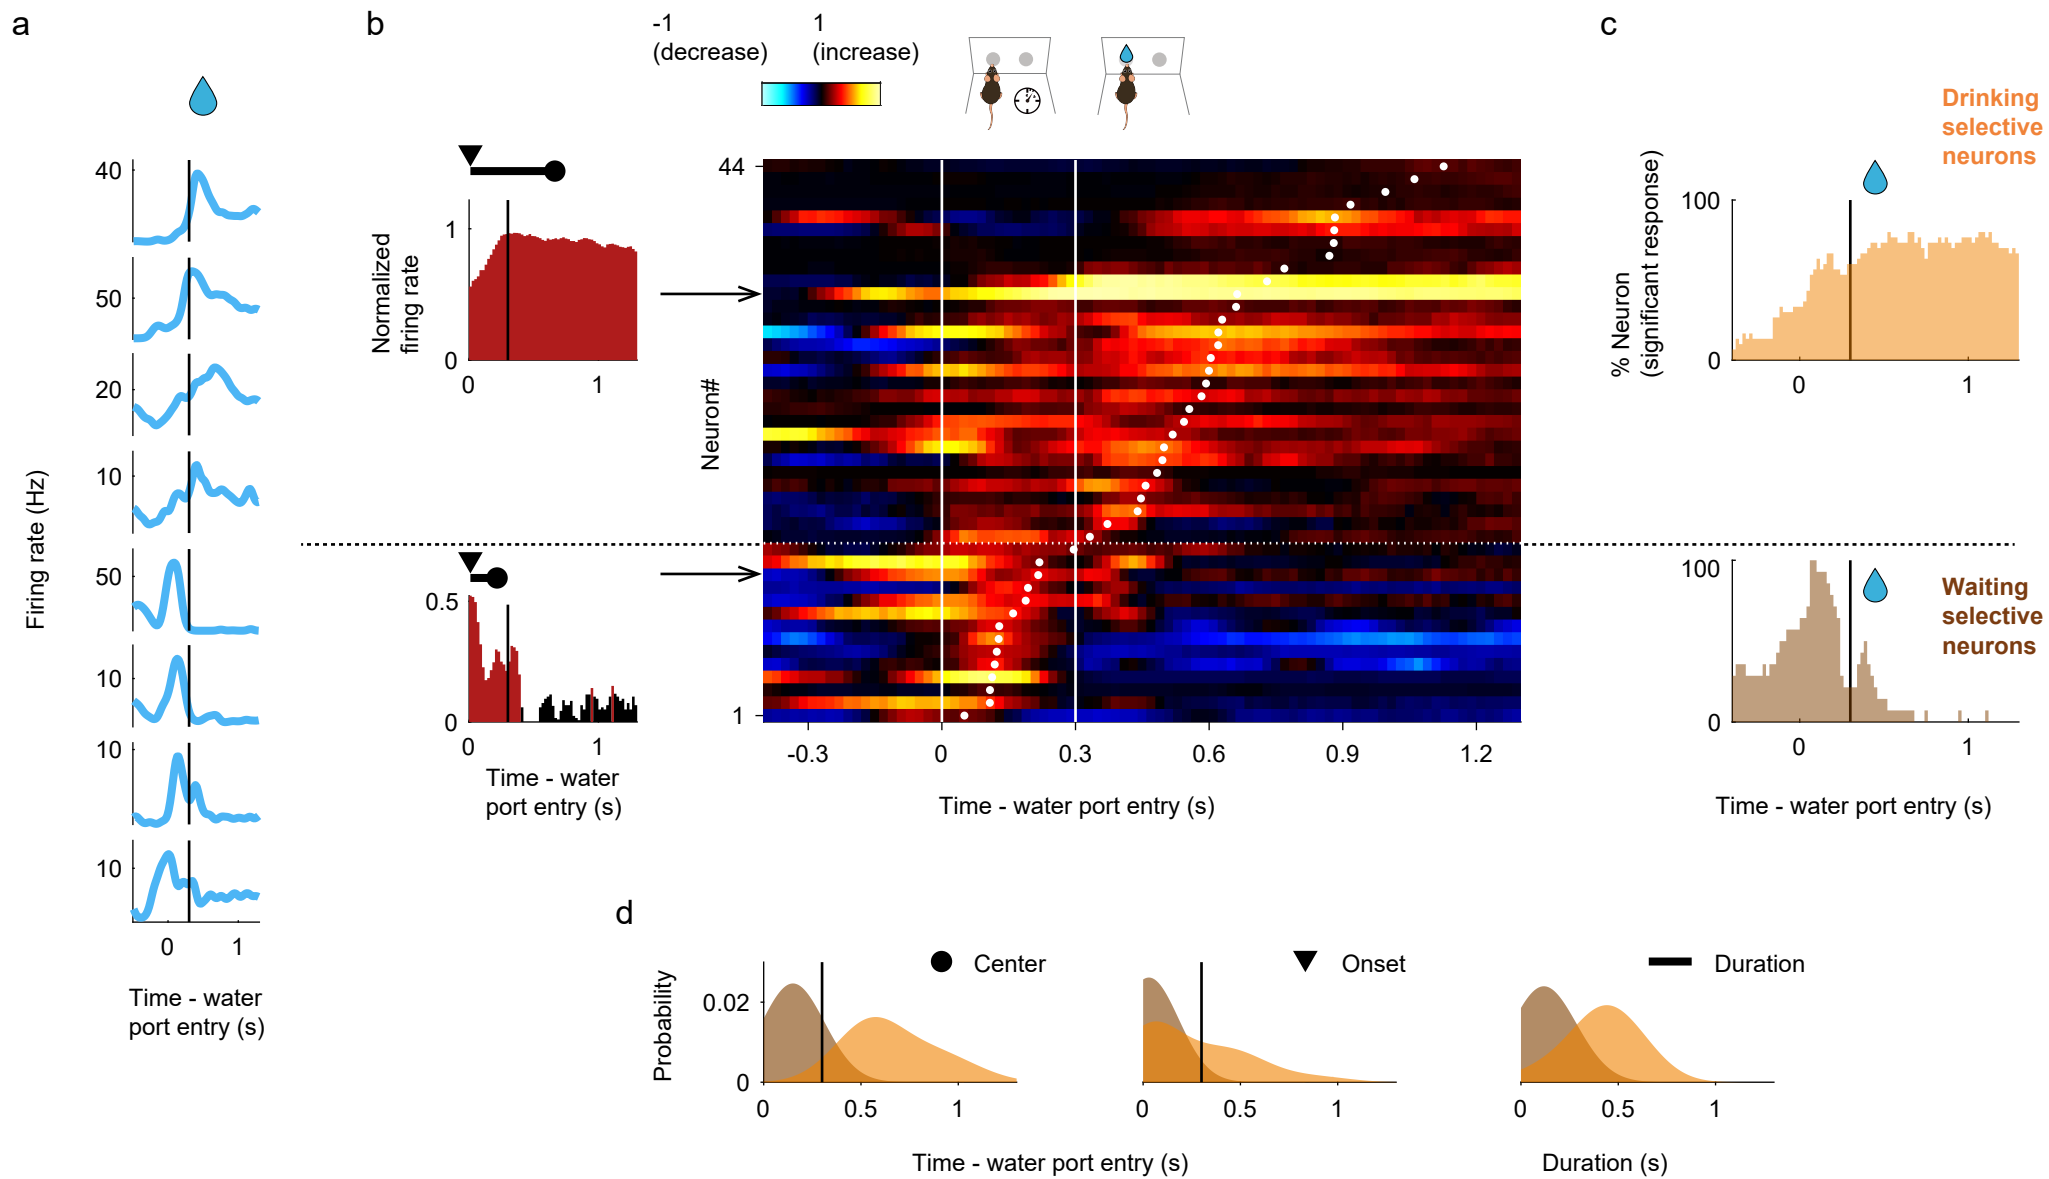

**Fig. 4**

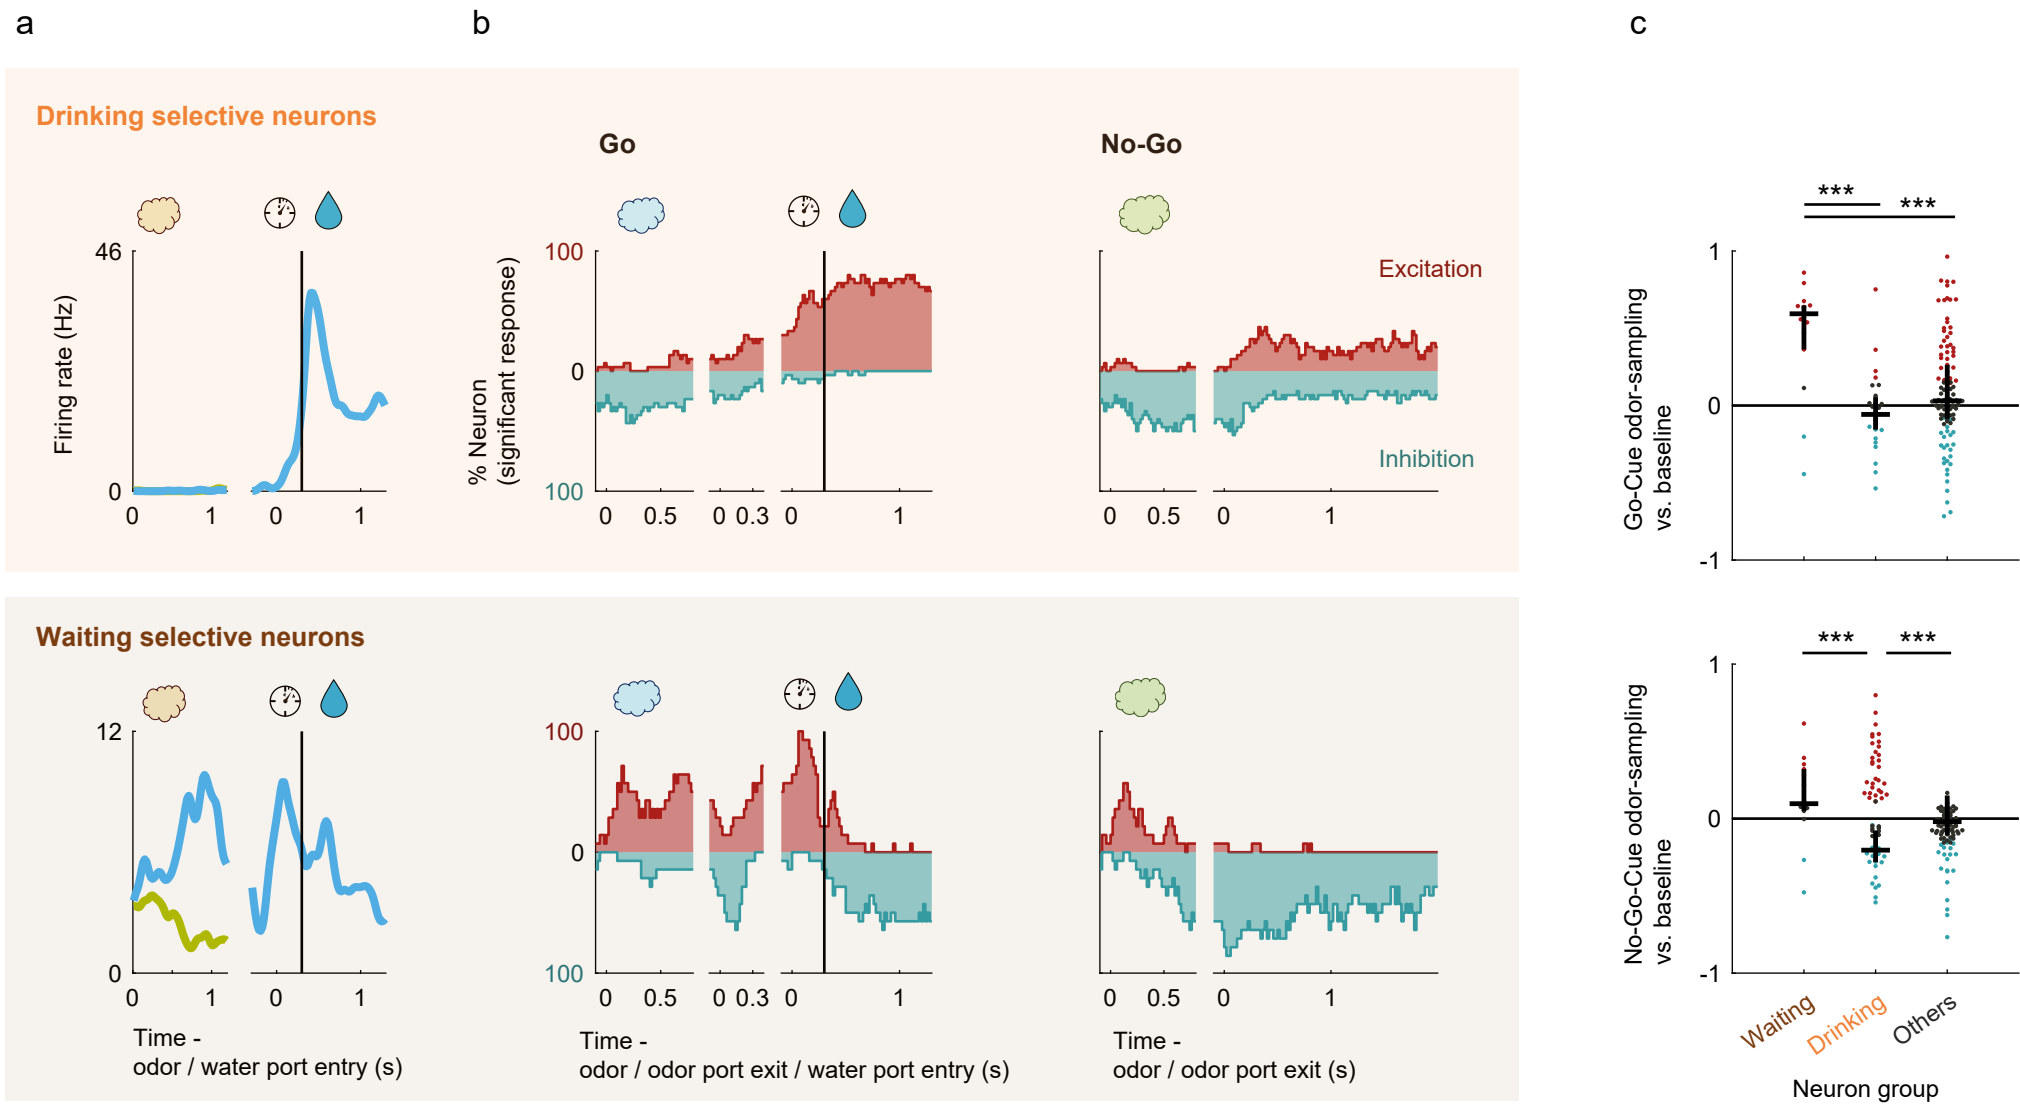

**Fig. 5**



a

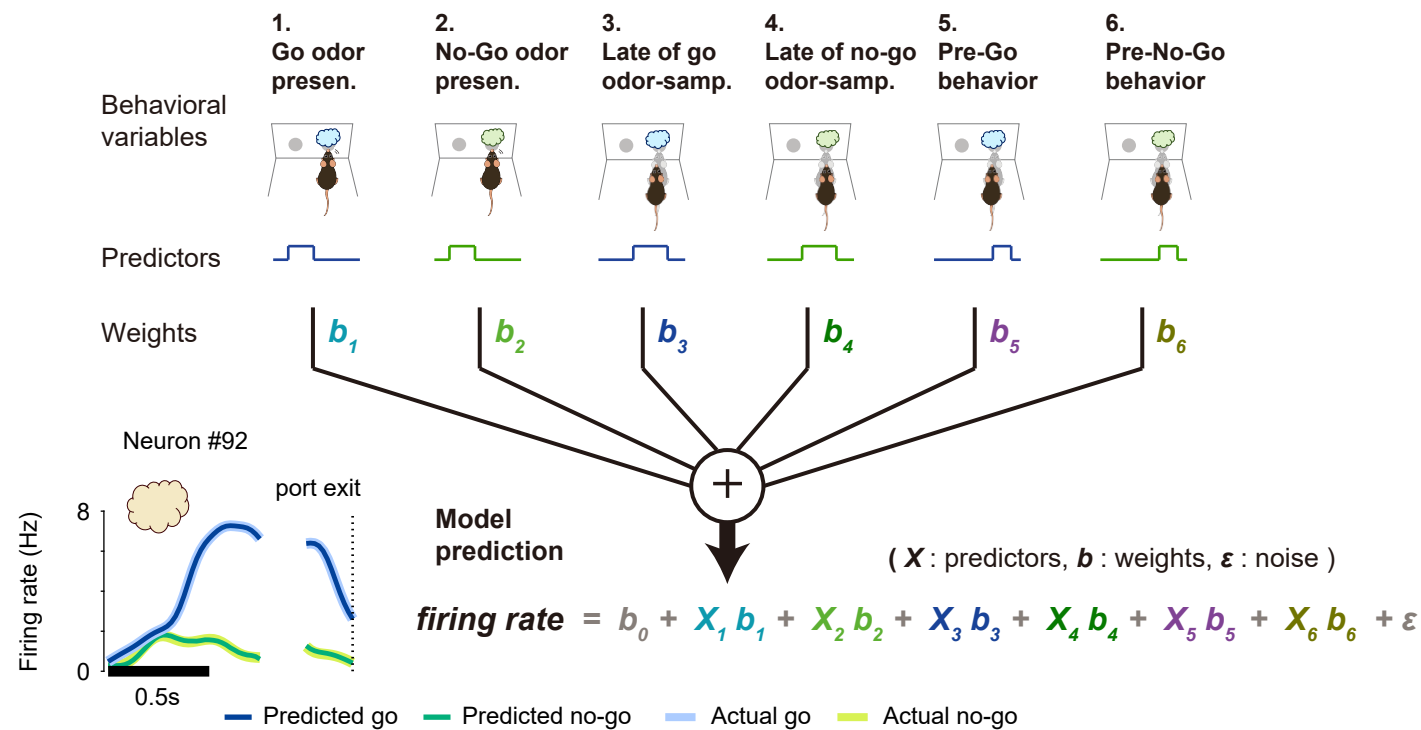

b

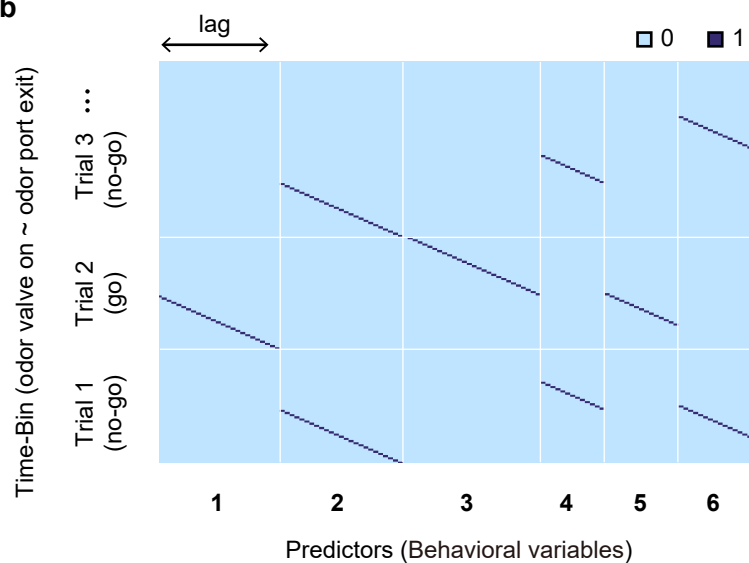

c

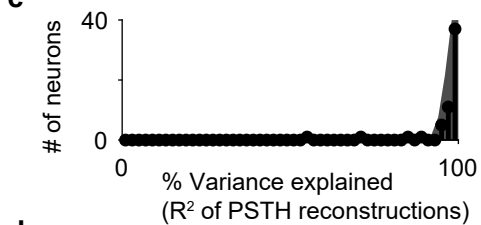

d

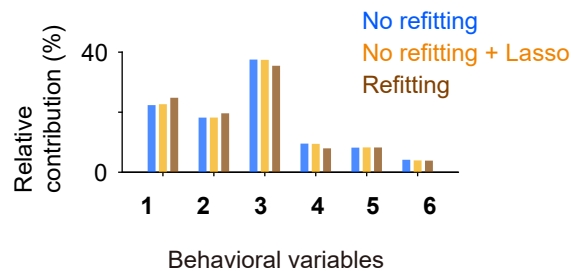

e

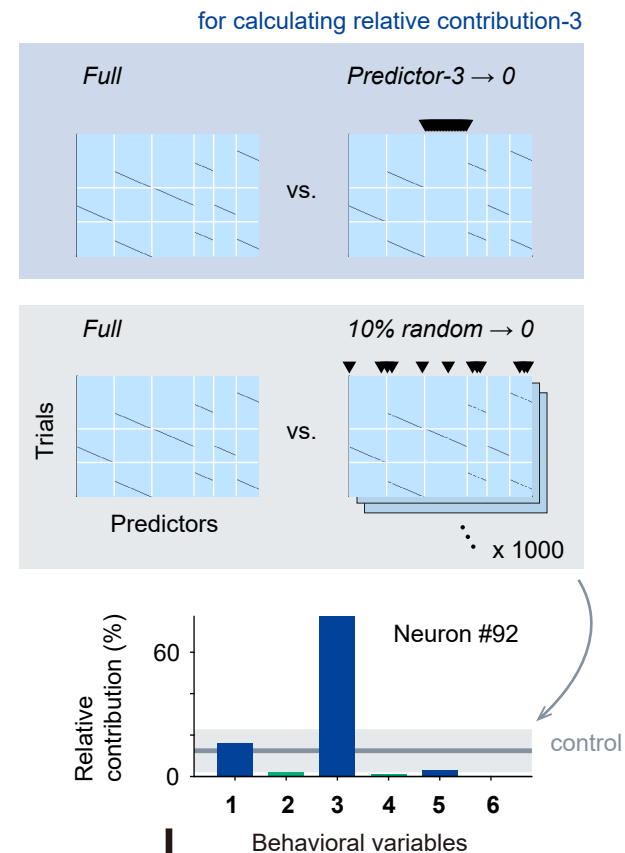

f

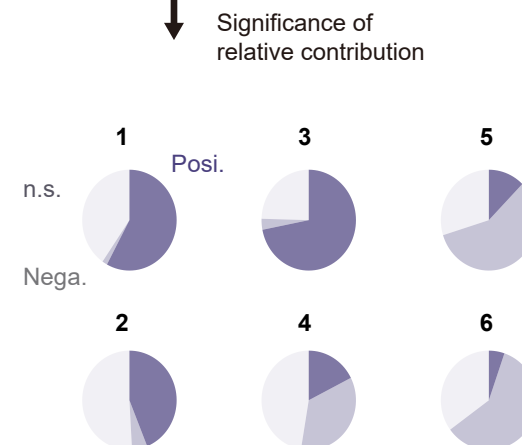

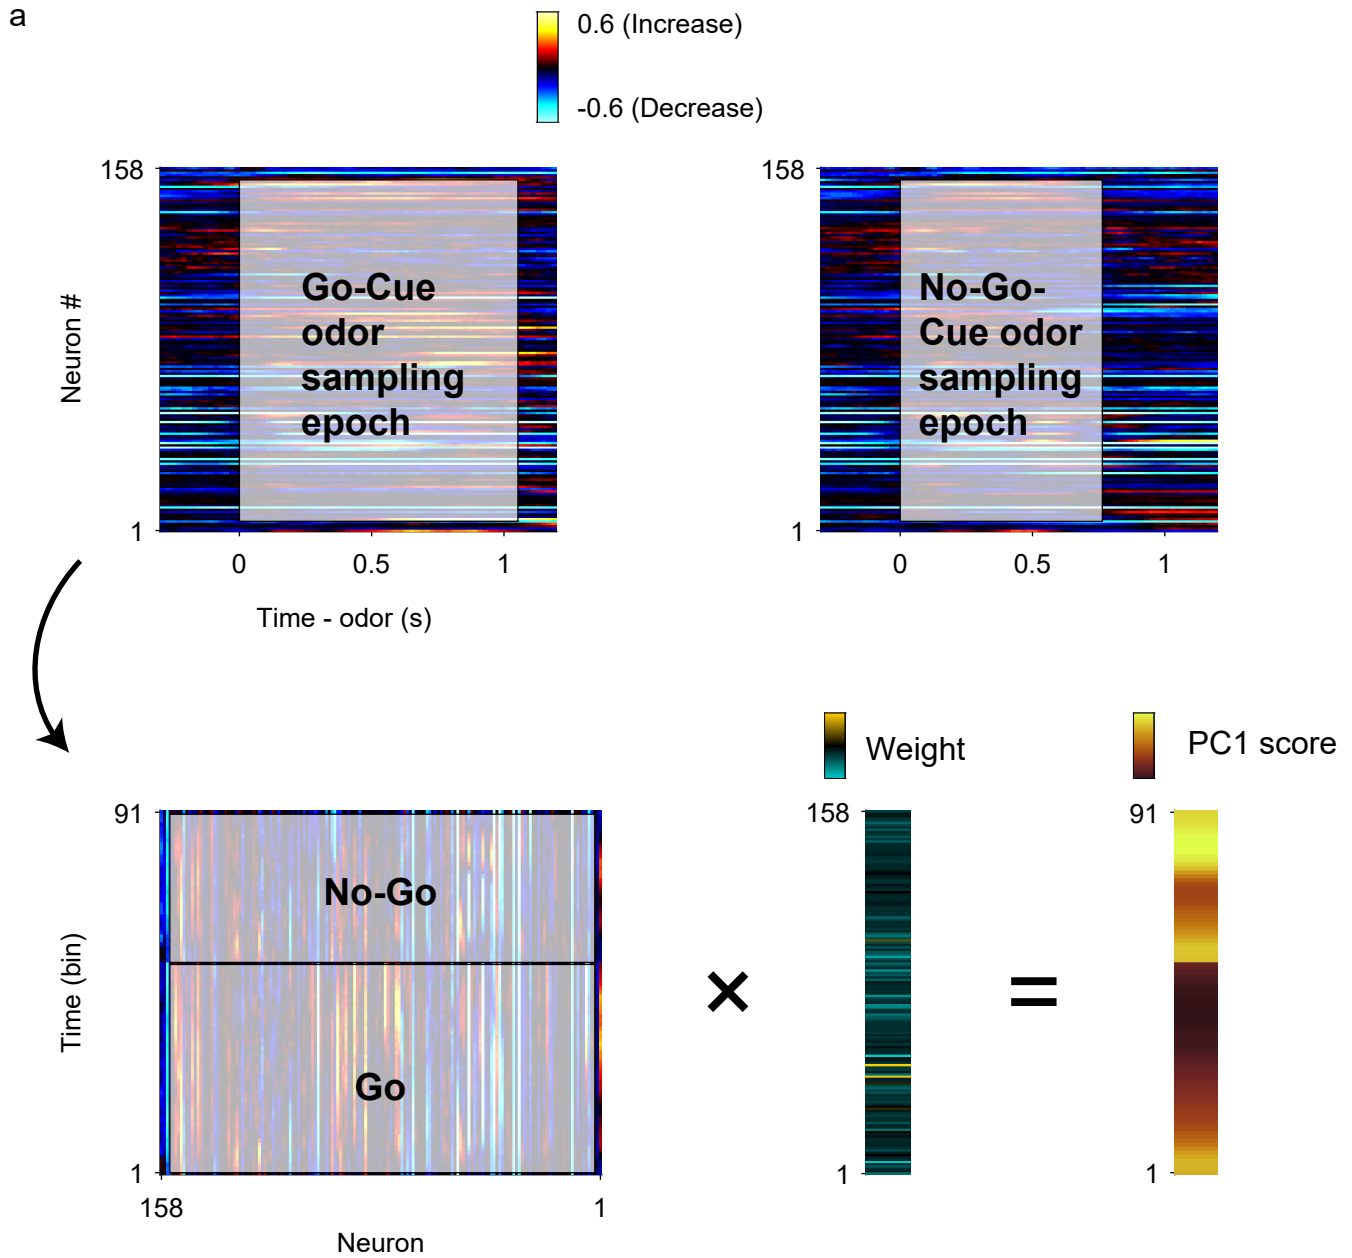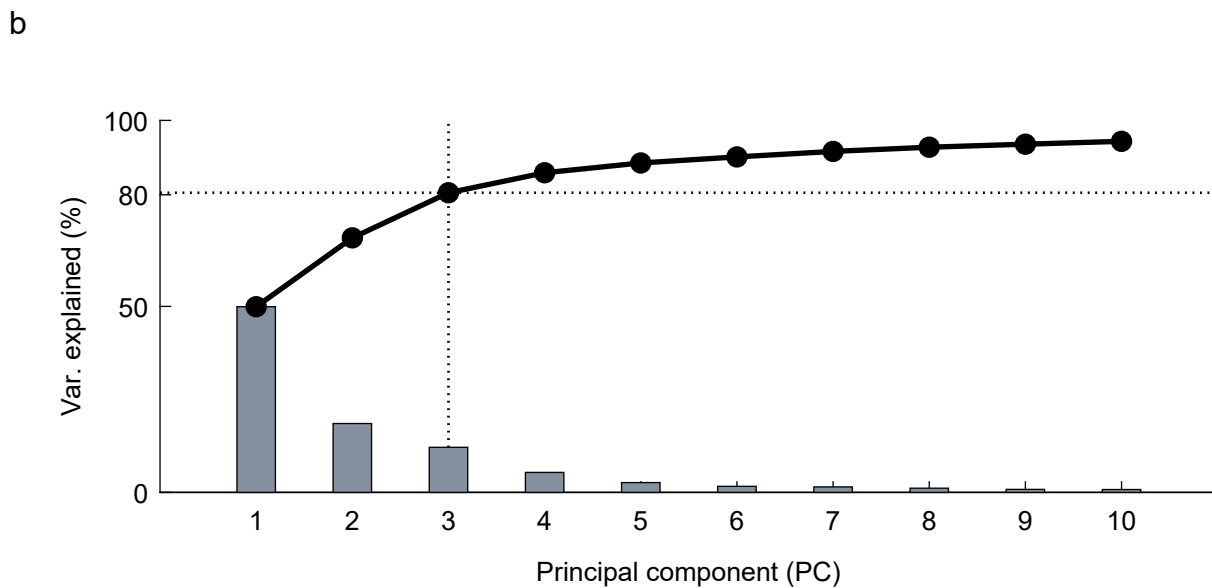

**Fig. S2**
